# Supplementary material for: Genome analyses reveal the hybrid origin of the staple crop white Guinea yam (Dioscorea rotundata)
Source: PubMed Central journal article supplement (PMC7749330; doi:10.1073/pnas.2015830117), 2020-12-02
Supplement: pnas.2015830117.sapp.pdf [file pnas.2015830117.sapp.pdf]

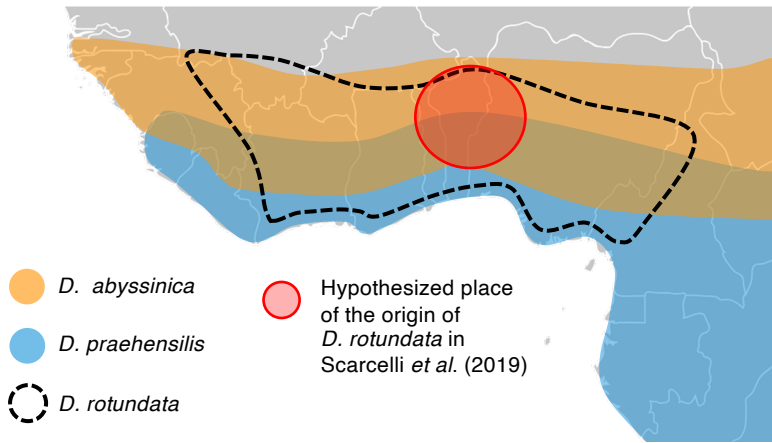

**Fig. S1. The geographical distributions of African yams.** Adapted from Scarcelli *et al.* (2017) (40) and Scarcelli *et al.* (2019) (28).

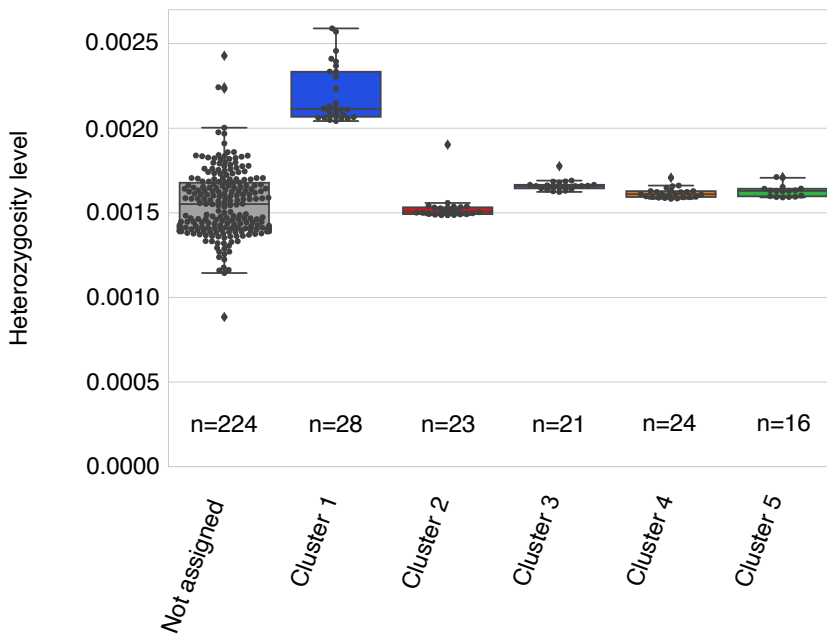

**Fig. S2. Heterozygosity levels of samples in five clusters of *D. rotundata*.** Heterozygosity level of an individual is defined as the ratio of number of heterozygous SNPs to the total number of mapped sites to the reference genome.

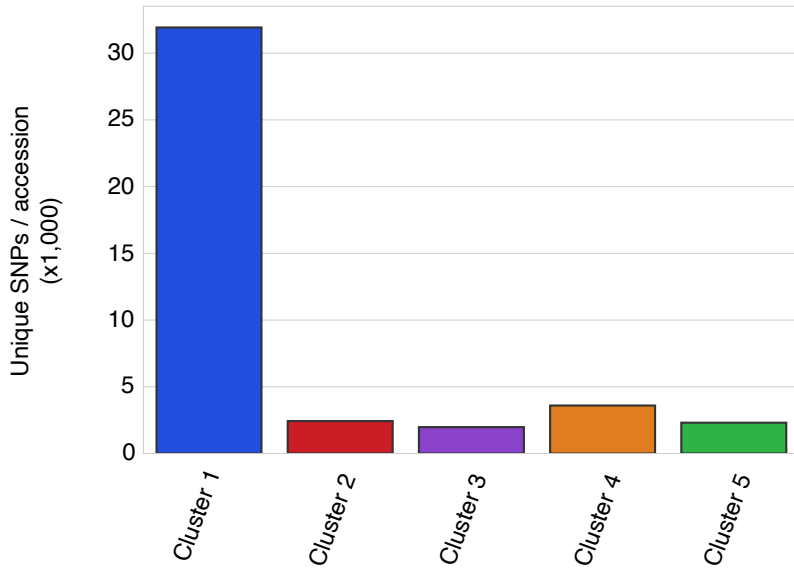

**Fig. S3.** Number of unique alleles in the five clusters of *D. rotundata*.

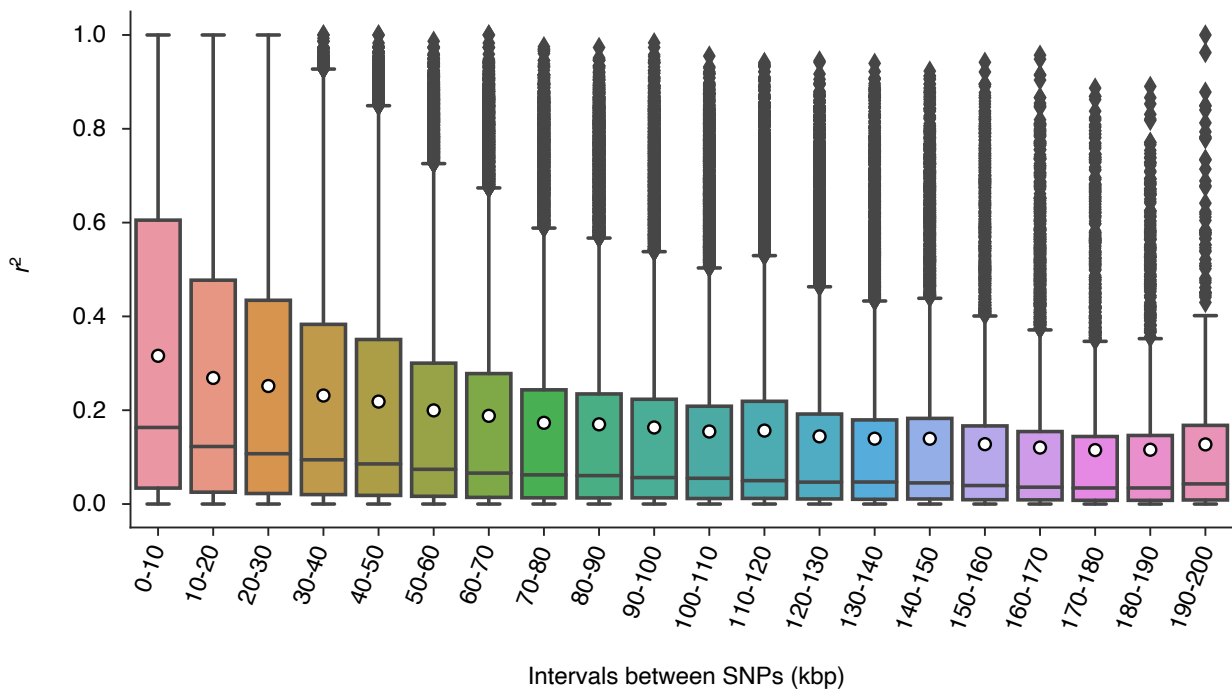

**Fig. S4.** LD decay of *D. rotundata*. Each white dot represents the average  $r^2$  in each interval.

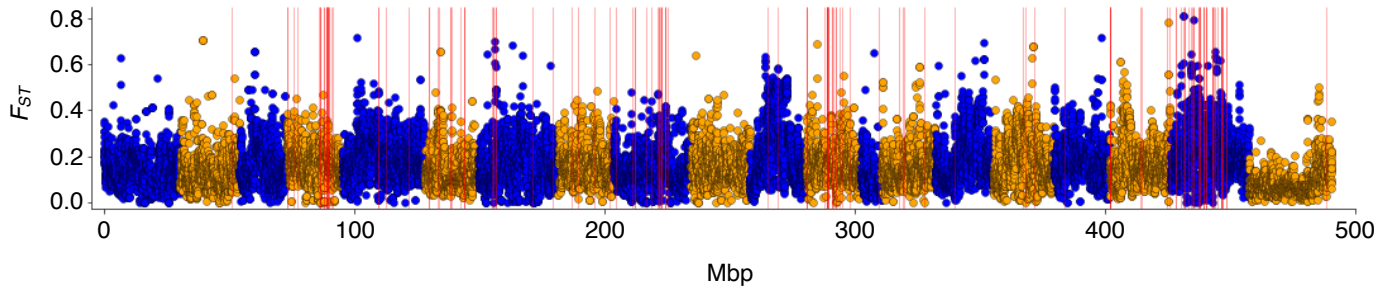

**Fig. S5.  $F_{ST}$  between *D. abyssinica* and *D. praehensilis*.**  $F_{ST}$  averages were calculated 100-kb window and 20-kb step. The red vertical lines represent the positions of the oppositely fixed SNPs in *D. abyssinica* and *D. praehensilis* as used in Fig. 2B.

**Table S1. For each Figure and Table, the number of SNPs studied, use of triploid *D. rotundata* samples (cluster 1), and use of Scarcelli's samples are indicated.**

| Figures/tables                          | No. analyzed SNPs | Triploid <i>D. rotundata</i> (in cluster 1) | Dioploid <i>D. rotundata</i> (not in cluster 1) | Samples in Scarcelli <i>et al.</i> 2019 |
|-----------------------------------------|-------------------|---------------------------------------------|-------------------------------------------------|-----------------------------------------|
| Fig. 1A and B, Fig. S2 and S3, Table S2 | 6,124,093         | yes                                         | yes                                             | -                                       |
| Table S3                                | 5,229,368         | no                                          | yes                                             | -                                       |
| Fig. 1C                                 | 463,293           | no                                          | yes                                             | C/A/P/R                                 |
| Fig. 1D                                 | 17,532            | no                                          | no                                              | C/A/P                                   |
| Table S5                                | 87,671            | no                                          | no                                              | C/A/P                                   |
| Fig. 2B                                 | 144               | no                                          | yes                                             | A/P/R                                   |
| Fig. 2C and 3C                          | 15,461            | no                                          | yes                                             | A/P/R                                   |
| Fig. 2D (A vs. R)                       | 649,679           | no                                          | yes                                             | A/R                                     |
| Fig. 2D (P vs. R)                       | 579,405           | no                                          | yes                                             | P/R                                     |
| Fig. S5 (A vs. P)                       | 362,125           | no                                          | no                                              | A/P                                     |
| Fig. 3A                                 | 250               | yes                                         | yes                                             | C/A/P/R                                 |
| Fig. 4B                                 | 2,343,307         | no                                          | yes                                             | A/P                                     |
| Fig. 4C                                 | 458               | no                                          | yes                                             | A/P                                     |

C: Cameroonian *D. praehensilis*

A: *D. abyssinica*

P: (Western) *D. praehensilis*

R: *D. rotundata*

**Table S2. Comparison of heterozygosity levels in the five clusters of *D. rotundata*.** Heterozygosity level of an individual is defined as the ratio of number of heterozygous SNPs to the total number of mapped sites to the reference genome. The diagonal cell represents the mean  $\pm$  standard deviation of the heterozygosity levels of the samples in each cluster. The other cells represent *P*-values of the difference of the heterozygosity levels between the two clusters as calculated by two-tailed Student *t* test. Cluster 1 has a significantly higher heterozygosity level than the other clusters.

|                         |                                                         |                                                         |                                                         |                                                         |                                                         |                                                         |
|-------------------------|---------------------------------------------------------|---------------------------------------------------------|---------------------------------------------------------|---------------------------------------------------------|---------------------------------------------------------|---------------------------------------------------------|
|                         | <b>Not assigned</b>                                     |                                                         |                                                         |                                                         |                                                         |                                                         |
| <b>Not assigned</b>     | 15.53 $\times 10^{-4}$<br>( $\pm 1.96 \times 10^{-4}$ ) | <b>Cluster 1</b>                                        |                                                         |                                                         |                                                         |                                                         |
| <b>Cluster 1 (n=28)</b> | 2.874 $\times 10^{-42}$                                 | 21.98 $\times 10^{-4}$<br>( $\pm 1.68 \times 10^{-4}$ ) | <b>Cluster 2</b>                                        |                                                         |                                                         |                                                         |
| <b>Cluster 2 (n=23)</b> | 0.5483                                                  | 1.453 $\times 10^{-22}$                                 | 15.29 $\times 10^{-4}$<br>( $\pm 0.84 \times 10^{-4}$ ) | <b>Cluster 3</b>                                        |                                                         |                                                         |
| <b>Cluster 3 (n=21)</b> | 0.01194                                                 | 8.305 $\times 10^{-19}$                                 | 2.582 $\times 10^{-8}$                                  | 16.62 $\times 10^{-4}$<br>( $\pm 0.32 \times 10^{-4}$ ) | <b>Cluster 4</b>                                        |                                                         |
| <b>Cluster 4 (n=24)</b> | 0.1188                                                  | 4.358 $\times 10^{-22}$                                 | 1.759 $\times 10^{-5}$                                  | 9.915 $\times 10^{-6}$                                  | 16.16 $\times 10^{-4}$<br>( $\pm 0.30 \times 10^{-4}$ ) | <b>Cluster 5</b>                                        |
| <b>Cluster 5 (n=16)</b> | 0.1203                                                  | 1.344 $\times 10^{-16}$                                 | 6.272 $\times 10^{-5}$                                  | 7.857 $\times 10^{-3}$                                  | 0.1972                                                  | 16.30 $\times 10^{-4}$<br>( $\pm 0.37 \times 10^{-4}$ ) |

**Table S3. Population genetics summary statistic in the 308 yam accessions**

|                      | After imputation         |
|----------------------|--------------------------|
| No. segregating site | 5,229,368                |
| No. singleton        | 1,227,900                |
| $\theta_w$           | 14.98 x 10 <sup>-4</sup> |
| $\theta_\pi$         | 14.83 x 10 <sup>-4</sup> |
| Tajima's <i>D</i>    | -0.0305                  |

**Table S4. Likelihood comparison in *ɔaɔi***

| Model                                                                                                                     | $\log_{10}(L)$ | No. parameters | AIC      | Illustration of the model |
|---------------------------------------------------------------------------------------------------------------------------|----------------|----------------|----------|---------------------------|
| {{A, P}, C}<br>(without migration)                                                                                        | -15289.70      | 6              | 30591.40 | -                         |
| {{P, C}, A}<br>(without migration)                                                                                        | -15765.32      | 6              | 31542.64 | -                         |
| {{C, A}, P}<br>(without migration)                                                                                        | -15765.15      | 6              | 31542.29 | -                         |
| {{A, P}, C}<br>(with migration)                                                                                           | -12739.86      | 10             | 25499.72 | Fig. 1D                   |
| {{A, R}, P}<br>(with migration)                                                                                           | -10149.73      | 10             | 20319.47 | -                         |
| {{P, R}, A}<br>(with migration)                                                                                           | -10385.46      | 10             | 20790.92 | -                         |
| {{A, R}, {P, R}}<br>(with migration)                                                                                      | -10052.96      | 9              | 20123.91 | Fig. 2C                   |
| {{A, R}, {P, R}}<br>- With migration<br>- With population growth<br>- Fix the parameters<br>except for population<br>size | -10046.73      | 6              | 20105.47 | Fig. 3C                   |

C: Cameroonian *D. praehensilis*

A: *D. abyssinica*

P: (Western) *D. praehensilis*

R: *D. rotundata*

**Table S5. Likelihood comparison in fastsimcoal2**

| Model                              | $\log_{10}(L)$ |
|------------------------------------|----------------|
| {{A, P}, C}<br>(without migration) | -172110.065    |
| {{P, C}, A}<br>(without migration) | -174281.072    |
| {{C, A}, P}<br>(without migration) | -173358.592    |

**Table S6.  $F_{ST}$  in each chromosome.** Red and blue indicates the highest and lowest  $F_{ST}$  in all chromosomes, respectively. Chromosome 11 of *D. rotundata* containing the sex-determining locus shows a lower distance to that of *D. abyssinica*.

| Chromosome | A vs. P      |           | A vs. R      |           | P vs. R      |           |
|------------|--------------|-----------|--------------|-----------|--------------|-----------|
|            | $F_{ST}$     | $\pm$ std | $F_{ST}$     | $\pm$ std | $F_{ST}$     | $\pm$ std |
| All        | 0.162        | 0.217     | 0.082        | 0.120     | 0.123        | 0.157     |
| chrom_01   | 0.156        | 0.222     | 0.079        | 0.109     | 0.084        | 0.112     |
| chrom_02   | 0.122        | 0.187     | 0.055        | 0.078     | 0.098        | 0.121     |
| chrom_03   | 0.177        | 0.224     | 0.075        | 0.103     | 0.101        | 0.115     |
| chrom_04   | 0.173        | 0.218     | 0.111        | 0.150     | 0.100        | 0.130     |
| chrom_05   | 0.201        | 0.257     | 0.098        | 0.128     | 0.115        | 0.133     |
| chrom_06   | 0.116        | 0.168     | 0.065        | 0.092     | 0.075        | 0.102     |
| chrom_07   | 0.161        | 0.231     | 0.093        | 0.122     | 0.084        | 0.114     |
| chrom_08   | 0.165        | 0.209     | 0.120        | 0.161     | 0.085        | 0.109     |
| chrom_09   | 0.129        | 0.170     | 0.129        | 0.150     | <b>0.062</b> | 0.102     |
| chrom_10   | 0.152        | 0.205     | 0.129        | 0.169     | 0.077        | 0.102     |
| chrom_11   | <b>0.277</b> | 0.273     | <b>0.033</b> | 0.052     | <b>0.247</b> | 0.231     |
| chrom_12   | 0.160        | 0.213     | 0.063        | 0.096     | 0.134        | 0.140     |
| chrom_13   | 0.111        | 0.161     | 0.064        | 0.100     | 0.108        | 0.120     |
| chrom_14   | 0.141        | 0.184     | 0.120        | 0.163     | 0.107        | 0.133     |
| chrom_15   | 0.204        | 0.243     | <b>0.133</b> | 0.152     | 0.073        | 0.104     |
| chrom_16   | 0.192        | 0.248     | 0.050        | 0.074     | 0.174        | 0.182     |
| chrom_17   | 0.180        | 0.201     | 0.062        | 0.080     | 0.217        | 0.221     |
| chrom_18   | 0.169        | 0.210     | 0.074        | 0.103     | 0.188        | 0.205     |
| chrom_19   | 0.191        | 0.240     | 0.080        | 0.110     | 0.133        | 0.152     |
| chrom_20   | <b>0.070</b> | 0.109     | 0.057        | 0.088     | 0.126        | 0.143     |

Table S7. List of genes in the five outlier loci (chromosome 14, 15, 17, 19) showing extreme  $f_4$  ( $P_{25}$ ,  $P_4$ ,  $P_P$ ,  $P_A$ ) values ( $|Z(f_4)| > 5$ ) in Figure 4B.

| Chromosome | Start    | End      | GeneID        | Annotation                                                                         |
|------------|----------|----------|---------------|------------------------------------------------------------------------------------|
| chrom_14   | 468088   | 469472   | DRNTG_17186.1 | (TrEMBL)Predicted protein(HORVV:F2DKZ3)                                            |
| chrom_14   | 484029   | 484961   | DRNTG_28166.1 | (TrEMBL)Uncharacterized protein(ENSVE:A0A444CGI1)                                  |
| chrom_14   | 485725   | 490867   | DRNTG_28165.1 | (TrEMBL)Endoplasmic reticulum metalloproteinase 1(ANACO:A0A199W086)                |
| chrom_14   | 492377   | 496008   | DRNTG_28164.1 | Auxin response factor 18(ORYSJ:Q653H7)                                             |
| chrom_14   | 496093   | 496525   | DRNTG_28163.1 | -                                                                                  |
| chrom_14   | 501391   | 506132   | DRNTG_28162.1 | Protein ENHANCED DISEASE RESISTANCE 2(ARATH:F4JSE7)                                |
| chrom_14   | 507961   | 513788   | DRNTG_28161.1 | Clathrin interactor EPSIN 2(ARATH:Q67YI9)                                          |
| chrom_14   | 514348   | 516233   | DRNTG_28160.1 | Mitochondrial import inner membrane translocase subunit PAM16 like 2(ARATH:Q93VV9) |
| chrom_14   | 516747   | 519058   | DRNTG_28159.1 | Cytokinin riboside 5'-monophosphate phosphoribohydrolase LOG4(ARATH:Q9LFH3)        |
| chrom_14   | 520890   | 523855   | DRNTG_28157.1 | Protein CNGC15c(MEDTR:A0A072VMJ3)                                                  |
| chrom_14   | 521076   | 521734   | DRNTG_28158.1 | Protein CNGC15c(MEDTR:A0A072VMJ3)                                                  |
| chrom_14   | 527056   | 529173   | DRNTG_28156.1 | Phytochrome-associated serine/threonine-protein phosphatase(PEA:Q8LSN3)            |
| chrom_14   | 531504   | 532632   | DRNTG_11714.1 | -                                                                                  |
| chrom_14   | 544864   | 552211   | DRNTG_11716.1 | Phenylalanine ammonia-lyase 3(PETCR:P45729)                                        |
| chrom_14   | 550860   | 554840   | DRNTG_11717.1 | Phenylalanine ammonia-lyase 3(PETCR:P45729)                                        |
| chrom_14   | 565849   | 567237   | DRNTG_11718.1 | (TrEMBL)Uncharacterized protein(SETIT:K3ZZF5)                                      |
| chrom_14   | 581692   | 585798   | DRNTG_11720.1 | E3 ubiquitin-protein ligase WAV3(ARATH:Q9LTA6)                                     |
| chrom_14   | 586418   | 589346   | DRNTG_11721.1 | General transcription factor IIH subunit 2(ARATH:Q9ZVN9)                           |
| chrom_14   | 589956   | 591825   | DRNTG_11722.1 | Probable mannitol dehydrogenase(FRAAN:Q9ZRF1)                                      |
| chrom_14   | 607695   | 608572   | DRNTG_25842.1 | -                                                                                  |
| chrom_14   | 612414   | 613708   | DRNTG_25841.1 | (TrEMBL)Uncharacterized protein(MUSAM:M0SPY3)                                      |
| chrom_14   | 624755   | 628872   | DRNTG_25840.1 | Phenylalanine ammonia-lyase 3(PETCR:P45729)                                        |
| chrom_14   | 632310   | 633887   | DRNTG_25839.1 | Phenylalanine ammonia-lyase(BROFI:Q42609)                                          |
| chrom_14   | 648000   | 649003   | DRNTG_25837.1 | -                                                                                  |
| chrom_14   | 681229   | 685056   | DRNTG_20830.1 | -                                                                                  |
| chrom_14   | 695533   | 696149   | DRNTG_12014.1 | Ferredoxin--NADP reductase, embryo isozyme, chloroplastic(ORYSJ:Q23877)            |
| chrom_14   | 696349   | 702726   | DRNTG_12015.1 | Serine--tRNA ligase, cytoplasmic(ARATH:Q39230)                                     |
| chrom_14   | 538878   | 542983   | DRNTG_11715.1 | Adenosine kinase 2(ARATH:Q9LZG0)                                                   |
| chrom_14   | 571194   | 575569   | DRNTG_11719.1 | Synaptotagmin-3(ARATH:Q7XA06)                                                      |
| chrom_14   | 604820   | 608527   | DRNTG_25843.1 | Synaptotagmin-3(ARATH:Q7XA06)                                                      |
| chrom_14   | 637226   | 641558   | DRNTG_25838.1 | Adenosine kinase 2(ARATH:Q9LZG0)                                                   |
| chrom_14   | 717990   | 726467   | DRNTG_12016.1 | Adenosine kinase 1(ARATH:Q9SF85)                                                   |
| chrom_15   | 19356271 | 19357116 | DRNTG_00821.1 | -                                                                                  |
| chrom_15   | 19362481 | 19363591 | DRNTG_00822.1 | -                                                                                  |
| chrom_15   | 19603544 | 19604222 | DRNTG_00824.1 | ADP,ATP carrier protein, mitochondrial (Fragment)(SOLTU:P27081)                    |
| chrom_15   | 19367597 | 19459040 | DRNTG_00823.1 | -                                                                                  |
| chrom_17   | 3877215  | 3877734  | DRNTG_07493.1 | -                                                                                  |
| chrom_17   | 3884570  | 3885375  | DRNTG_07491.1 | (TrEMBL)Acyl-coenzyme A thioesterase 13 (Fragment)(9ARAE:A0A1D1Y7U4)               |
| chrom_17   | 3896927  | 3897383  | DRNTG_07490.1 | -                                                                                  |
| chrom_17   | 3918976  | 3920856  | DRNTG_07489.1 | Cytochrome c-type biogenesis CcmH-like mitochondrial protein(ORYSJ:Q6K7S7)         |
| chrom_17   | 3924485  | 3925384  | DRNTG_07488.1 | Cytochrome c-type biogenesis CcmH-like mitochondrial protein(ORYSI:B8AFK5)         |
| chrom_17   | 3959026  | 3959941  | DRNTG_07487.1 | -                                                                                  |
| chrom_17   | 3967202  | 3969537  | DRNTG_07486.1 | 50S ribosomal protein L1, chloroplastic(SPIOL:Q9LE95)                              |
| chrom_17   | 3969570  | 3969827  | DRNTG_07485.1 | -                                                                                  |
| chrom_17   | 3978228  | 3979444  | DRNTG_07484.1 | 24-methylenesterol C-methyltransferase 2(ORYSJ:O82427)                             |
| chrom_17   | 3986569  | 3989639  | DRNTG_07482.1 | Cytochrome c-type biogenesis CcmH-like mitochondrial protein(ORYSJ:Q6K7S7)         |
| chrom_17   | 3986754  | 3989091  | DRNTG_07483.1 | Cytochrome c-type biogenesis CcmH-like mitochondrial protein(ORYSJ:Q6K7S7)         |
| chrom_17   | 4026863  | 4027853  | DRNTG_07481.1 | Cytochrome c-type biogenesis CcmH-like mitochondrial protein(ORYSI:B8AFK5)         |
| chrom_17   | 4106911  | 4108859  | DRNTG_01733.1 | Non-specific lipid-transfer protein Cw18(HORVU:Q43871)                             |
| chrom_17   | 4108922  | 4112102  | DRNTG_01734.1 | Mitochondrial arginine transporter BAC2(ARATH:Q9CA93)                              |
| chrom_17   | 3875895  | 3883658  | DRNTG_07492.1 | Putative E3 ubiquitin-protein ligase LIN-1(LOTJA:C6L7U1)                           |
| chrom_17   | 4095647  | 4096298  | DRNTG_01732.1 | -                                                                                  |
| chrom_17   | 4053722  | 4106059  | DRNTG_01731.1 | Protein SWEETIE(ARATH:F4HRS2)                                                      |
| chrom_19   | 8230520  | 8231387  | DRNTG_01547.1 | -                                                                                  |
| chrom_19   | 8307448  | 8308110  | DRNTG_01549.1 | -                                                                                  |
| chrom_19   | 8314683  | 8319901  | DRNTG_01550.1 | -                                                                                  |
| chrom_19   | 8319680  | 8322207  | DRNTG_01551.1 | Glycerol-3-phosphate acyltransferase RAM2(MEDTR:K7PEY4)                            |
| chrom_19   | 8306157  | 8311914  | DRNTG_01548.1 | EID1-like F-box protein 3(ARATH:Q93ZT5)                                            |
| chrom_19   | 17790629 | 17791141 | DRNTG_03384.1 | Mannose-specific lectin(GALNI:P30617)                                              |
| chrom_19   | 17801425 | 17802462 | DRNTG_03385.1 | Inorganic phosphate transporter 1-11(ORYSJ:Q94DB8)                                 |
| chrom_19   | 17850805 | 17857145 | DRNTG_03386.1 | (TrEMBL)uncharacterized protein LOC103722397 isoform X1(PHODC:A0A2H3ZB91)          |
| chrom_19   | 17964831 | 17971340 | DRNTG_03389.1 | Remorin 4.1(ORYSJ:Q7XII4)                                                          |
| chrom_19   | 17858513 | 17859406 | DRNTG_03387.1 | -                                                                                  |
| chrom_19   | 17914955 | 17927446 | DRNTG_03388.1 | Auxin response factor 12(ORYSI:Q258Y5)                                             |

## Materials and Methods

### Table of contents

- S1. Reference assembly
  - S1.1 Whole-genome sequencing using Oxford Nanopore Technology
  - S1.2 Quality control
  - S1.3 *De novo* assembly
  - S1.4 Polishing and removing duplicated contigs
  - S1.5 Gene prediction and annotation
- S2. Generation of pseudo-chromosomes by anchoring contigs onto a linkage map
  - S2.1 Preparing the mapping population
  - S2.2 Whole-genome resequencing
  - S2.3 Quality control and alignment
  - S2.4 Identification of parental line-specific heterozygous markers
  - S2.5 Anchoring and ordering contigs
- S3. Genetic diversity analysis
  - S3.1 Whole-genome resequencing of Guinea yam accessions
  - S3.2 Quality control, alignment, and SNP calling
  - S3.3 Unsupervised clustering analysis
  - S3.4 Polymorphism and ploidy of nuclear genomes
- S4. Phylogenomic analysis of African yam
  - S4.1 Data preparation
  - S4.2 Neighbor-joining tree
  - S4.3 Inferring the evolutionary history of wild *Dioscorea* species using  $\partial a\partial i$
  - S4.4 Inferring the evolutionary history of wild *Dioscorea* species using fastsimcoal2
- S5. Test of hybrid origin
  - S5.1 Site frequency spectrum polarized by two candidate progenitors of Guinea yam
  - S5.2 Inferring the domestication history of Guinea yam using  $\partial a\partial i$
  - S5.3 Comparison of  $F_{ST}$  on each chromosome among three African yams
- S6. Haplotype network analysis of the whole plastid genome
- S7. Inferring the changes in population size
- S8. Exploring the possibility of extensive introgression from wild *Dioscorea* species



## S1. Reference assembly

### S1.1 Whole-genome sequencing using Oxford Nanopore Technology

To generate version 2 of the *Dioscorea rotundata* reference genome sequence, we sequenced an F1 individual plant named “TDr96\_F1” using the PromethION sequencer (Oxford Nanopore Technologies). “TDr96\_F1” was the same individual plant used to obtain version 1 of the *D. rotundata* reference genome sequence (1). “TDr96\_F1” DNA was extracted from fresh leaves as described (1). The DNA was subjected to size selection and purification with a gel extraction kit (Large Fragment DNA Recovery Kit; Zymo Research). The purified DNA was sequenced using PromethION at GeneBay, Yokohama, Japan (<http://genebay.co.jp>).

### S1.2 Quality control

As a first step in our pipeline for genome assembly (Fig. SM1), we removed the lambda phage genome from raw reads with NanoLyse v1.1 (2). We then filtered out reads with an average read quality score of less than 7 and those shorter than 1,000 bases with Nanofilt v2.2 (2). This was followed by trimming of the first 75 bases to remove low-quality bases in all read that were retained. This generated 3,124,439 reads, corresponding to 20.89 Gbp of sequence (Table SM1).

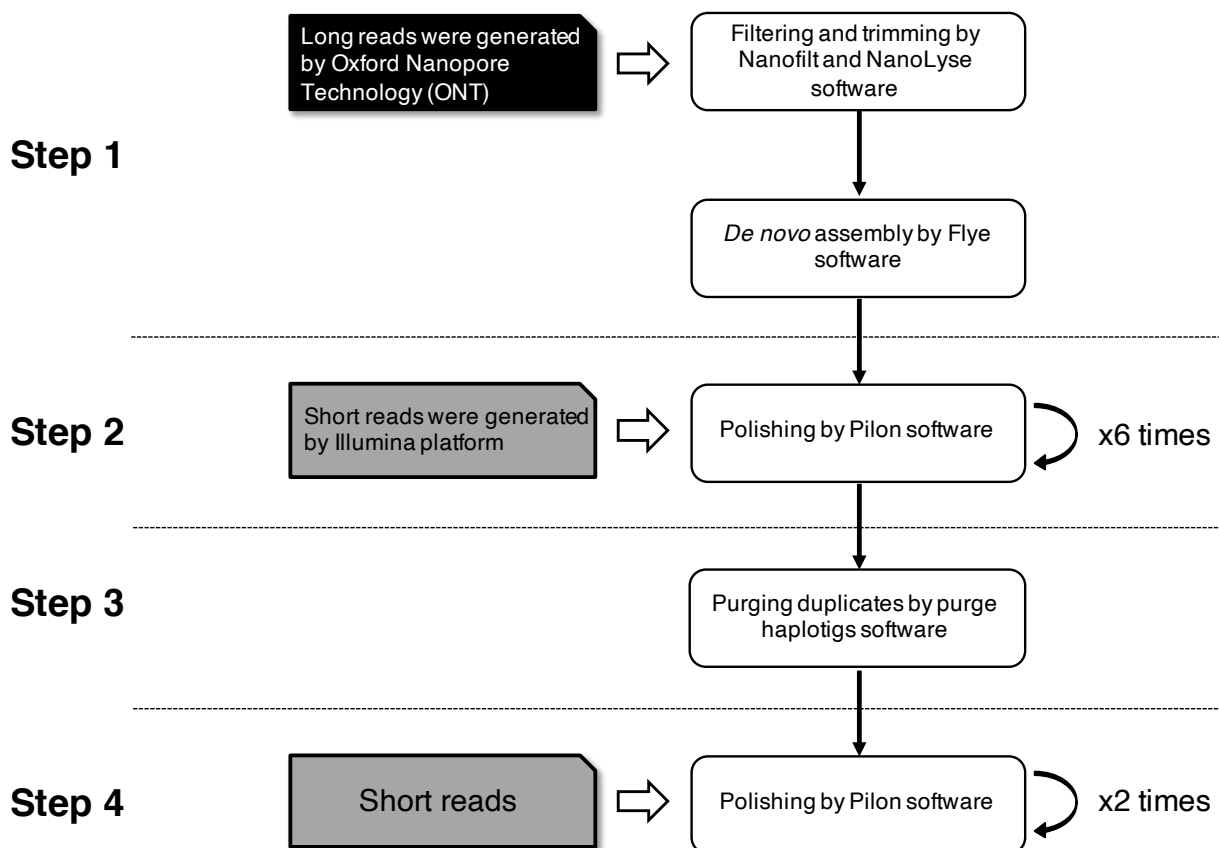

Fig. SM1. Pipeline of genome assembly Ver. 2.

**Table SM1. Summary of filtered ONT reads.**

| <b>Summary</b>             |           |
|----------------------------|-----------|
| Number of reads            | 3,124,439 |
| Total base pairs (Gb)      | 20.89     |
| Genome coverage            | 36.6x     |
| Average fragment size (Kb) | 6.7       |
| Longest fragment           | 211,597   |
| Shortest fragment          | 1,000     |
| Fragment N50 (Kb)          | 8.0       |

- Raw reads were registered in DDBJ under accession number DRR196916.
- Genome coverage was estimated based on the expected genome size of *D. rotundata* (570Mb).

### **S1.3 De novo assembly**

We assembled filtered long DNA sequence reads with Flye v2.4.2 (3), using 570 Mb as the estimated genome size of *D. rotundata* (1). This generated 8,721 contigs with N50 of 137,007 base pairs (Step 1 in Table SM2) and a total size of 636.8 Mb, which is larger than the expected *D. rotundata* genome size of 570 Mb. To evaluate the completeness of the gene set in the assembled contigs, we applied BUSCO analysis (Bench-Marking Universal Single Copy) v3.0.2 (4). For BUSCO analysis, we set “genome” as the assessment mode and used Embryophyta *odb9* as the database and obtained 40.7% complete BUSCOs (Step 1 in Table SM2).

**Table SM2. Summary of the reference assembly.**

|                                     | Step 1    | Step 2    | Step 3    | Step 4           |
|-------------------------------------|-----------|-----------|-----------|------------------|
| Total number of contigs             | 8,721     | 8,721     | 6,513     | <b>6,513</b>     |
| Total base-pairs (Mbp)              | 636.8     | 628.2     | 579.7     | <b>579.4</b>     |
| Average contig size (bp)            | 73,008    | 72,029    | 89,004    | <b>88,961</b>    |
| Longest contig (bp)                 | 2,301,335 | 2,267,833 | 2,267,833 | <b>2,267,326</b> |
| Shortest contig (bp)                | 171       | 171       | 171       | <b>171</b>       |
| N50 (bp)                            | 137,007   | 134,605   | 152,963   | <b>152,929</b>   |
| Complete BUSCOs (%)                 | 40.7      | 89.9      | 89.3      | <b>90.1</b>      |
| Complete and single-copy BUSCOs (%) | 39.9      | 83.9      | 84.9      | <b>85.7</b>      |
| Complete and duplicated BUSCOs (%)  | 0.8       | 6.0       | 4.4       | <b>4.4</b>       |
| Fragmented BUSCOs (%)               | 8.2       | 3.2       | 3.2       | <b>3.1</b>       |
| Missing BUSCOs (%)                  | 51.1      | 6.9       | 7.5       | <b>6.8</b>       |

### **S1.4 Polishing and removing duplicated contigs**

To correct the assembled contigs, we repeatedly polished them with Illumina short reads (Table SM3) using Pilon v1.23 (5) until there was no further change in the % of complete BUSCOs. We aligned Illumina jump reads as single reads to the assembled contigs using the bwa mem command in BWA v0.7.17 (6) and sorted the BAM files with SAMtools v1.9 (7). The BAM files were used to run Pilon with the option “--diploid”. We polished the contigs six times. The percentage of complete BUSCOs

was 89.9% after the first polishing step (Step 2 in Fig. SM1). To remove duplicated contigs, we used Purge Haplotigs v1.0.2 (8), which removes duplicated contigs based on depth and the number of matching bases (Step 3 in Fig. SM1). In Purge Haplotigs, the percent cutoff of alignment coverage was set to 95%. Finally, we polished the contigs again. The percentage of complete BUSCOs was 90.1% after the second polishing process (Step 4 in Fig. SM1). Comparing the features in the old reference genome with the new reference genome, the number of missing bases (“N”) was drastically reduced (Table SM4).

**Table SM3. Sequence list used for polishing.**

| Name                      | Sequence Platform   | Total size (Gb) | Genome coverage | Accession No. |
|---------------------------|---------------------|-----------------|-----------------|---------------|
| Fragment (PE)             | Illumina Miseq      | 16.77           | 29.4x           | DRR027644     |
| MP jump reads (as Single) |                     |                 |                 |               |
| for 2k                    | Illumina Hiseq 2500 | 6.43            | 11.3x           | DRR027645     |
| for 3k                    | Illumina Hiseq 2500 | 7.56            | 13.3x           | DRR027646     |
| for 4k                    | Illumina Hiseq 2500 | 6.18            | 10.8x           | DRR027647     |
| for 5k                    | Illumina Hiseq 2500 | 7.20            | 12.6x           | DRR027648     |
| for 6k                    | Illumina Hiseq 2500 | 7.27            | 12.8x           | DRR027649     |
| for 8k                    | Illumina Hiseq 2500 | 6.79            | 11.9x           | DRR027650     |

- All values are calculated after quality control.

- Genome coverage was estimated based on the expected genome size of *D. rotundata* (570 Mb).

**Table SM4. Comparison of the old (*I*) and new reference assemblies.**

| Feature                    | Ver. 1     | Ver. 2 |
|----------------------------|------------|--------|
| Number of scaffolds*       | 4,723      | 6,513  |
| Total scaffold* size (Mbp) | 594.23     | 579.41 |
| Longest scaffold* (Mbp)    | 13.61      | 2.28   |
| N50 (Mbp)                  | 2.12       | 0.15   |
| Total ‘N’ bp               | 90,097,902 | 953    |
| Complete BUSCOs (%)        | 90.7       | 90.1   |

\*In Version 2, contigs were used instead of scaffolds.

### **S1.5 Gene prediction and annotation**

For gene prediction, we used 20 RNA-Seq data sets representing 15 different organs and three different flowering stages in male and female plants (Table SM5). Total RNA was used to construct cDNA libraries using a TruSeq RNA Sample Prep Kit V2 (Illumina) according to the manufacturer’s instructions. The extracted RNA was sequenced on the Illumina platforms NextSeq500 and HiSeq4000. In the quality control step, we filtered the reads and discarded reads shorter than 50 bases and those with an average read quality below 20 and trimmed poly(A) sequences with FaQCs v2.08 (9). Quality trimmed reads were aligned to the newly assembled contigs with HISAT2 v2.1 (10) with the options “--no-mixed --no-discordant --dta”. Transcript alignments were assembled with StringTie v1.3.6 (11) separately for each BAM file. These GFF files were

integrated with TACO v0.7.3 (12) with the option “--filter-min-length 150”, generating 26,609 gene models within the new assembly (Table SM6). Additionally, coding sequences (CDSs) that were predicted using the previous reference genome (1) were aligned to the newly assembled contigs with Spaln2 v2.3.3 (13). Consequently, 8,889 CDSs that did not overlap with the new gene models were added to the new gene models (Table SM6). Finally, gene models shorter than 75 bases were removed, and InterProScan v5.36 (14) was used to predict ORFs (open reading frames) and strand information for each gene model. We predicted 35,498 genes, including 66,561 transcript variants (Table SM6). For gene annotation, the predicted gene models were searched in the Pfam protein family database using InterProScan (14) and with the blastx command in BLAST+ (15) with the option “-evalue 1e-10”, using the Viridiplantae database from UniProt as the target database. The resulting gene models and annotations were uploaded to ENSEMBL ([http://plants.ensembl.org/Dioscorea\\_rotundata/Info/Index](http://plants.ensembl.org/Dioscorea_rotundata/Info/Index)).

**Table SM5. Summary of RNA-seq data used for gene prediction.**

| Sample name             | Fastq size     |                | Sequence platform | Comment                                 | Accession No. |
|-------------------------|----------------|----------------|-------------------|-----------------------------------------|---------------|
|                         | Original (Gbp) | Filtered (Gbp) |                   |                                         |               |
| 01_Flowers-rachis-top   | 4.36           | 4.28           | NextSeq500        | Top 2 cm of inflorescence               | DRR063119     |
| 02_Flowers-rachis-lower | 4.96           | 4.87           | NextSeq500        | Lower 2 cm of inflorescence             | DRR063118     |
| 03_Flower-bud           | 3.52           | 3.46           | NextSeq500        | Flower bud                              | DRR063116     |
| 04_Axillary-bud         | 4.31           | 4.23           | NextSeq500        | Axillary bud                            | DRR063115     |
| 05_Leaf                 | 3.26           | 3.18           | NextSeq500        | Leaf                                    | DRR045127     |
| 06_Petiole              | 4.47           | 4.38           | NextSeq500        | Petiole                                 | DRR063121     |
| 07_Pulvinus             | 4.66           | 4.58           | NextSeq500        | Pulvinus                                | DRR063120     |
| 08_Rachis               | 4.59           | 4.51           | NextSeq500        | Rachis                                  | DRR063117     |
| 09_Stem                 | 3.45           | 3.36           | NextSeq500        | Young_stem                              | DRR045129     |
| 10_Spine                | 4.51           | 4.43           | NextSeq500        | Spine                                   | DRR063123     |
| 11_Root                 | 3.62           | 3.54           | NextSeq500        | Root                                    | DRR063122     |
| 12_Tuber-head           | 4.72           | 4.65           | NextSeq500        | Tuber (head)                            | DRR063126     |
| 13_Tuber-middle         | 4.06           | 4.00           | NextSeq500        | Tuber (middle)                          | DRR063125     |
| 14_Tuber-tail           | 4.48           | 4.40           | NextSeq500        | Tuber (tail)                            | DRR063124     |
| 15_fem_Y917-1           | 4.12           | 4.08           | HiSeq4000         | TDr97_00917 female flower early stage 1 | DRR208398     |
| 16_fem_Y917-2           | 4.27           | 4.23           | HiSeq4000         | TDr97_00917 female flower early stage 2 | DRR208399     |
| 17_fem_Y917-3           | 4.43           | 4.37           | HiSeq4000         | TDr97_00917 female flower early stage 3 | DRR208400     |
| 18_mal_Y777-1           | 4.48           | 4.42           | HiSeq4000         | TDr97_00777 male flower early stage 1   | DRR208401     |
| 19_mal_Y777-2           | 3.43           | 3.40           | HiSeq4000         | TDr97_00777 male flower early stage 2   | DRR208402     |
| 20_mal_Y777-3           | 4.13           | 4.09           | HiSeq4000         | TDr97_00777 male flower early stage 3   | DRR208403     |

**Table SM6. Summary of gene prediction.**

|                             | <b>Contigs<br/>(6,513)</b> | <b>Pseudo Chrom.<br/>(01~20)</b> |
|-----------------------------|----------------------------|----------------------------------|
| No. genes                   | 35,498                     | 30,344                           |
| (Total transcript variants) | (66,561)                   | (57,637)                         |
| ORF status                  |                            |                                  |
| Complete                    | 22,423                     | 19,502                           |
| 5' partial                  | 1,225                      | 1,018                            |
| 3' partial                  | 10,385                     | 8,594                            |
| Internal                    | 559                        | 465                              |
| No ORF                      | 906                        | 765                              |
| Prediction software         |                            |                                  |
| TACO (12)                   | 26,609                     | 23,335                           |
| Spaln2 (13)                 | 8,889                      | 7,009                            |

## **S2. Generation of pseudo-chromosomes by anchoring contigs onto a linkage map**

### **S2.1 Preparing the mapping population**

To develop the chromosome-scale TDr96\_F1 genome sequence from the assembled contigs, we generated an F1 population containing 156 individuals by crossing two *D. rotundata* breeding lines: TDr04/219 as the female parent (P1) and TDr97/777 as the male parent (P2).

### **S2.2 Whole-genome resequencing**

We extracted each DNA sample from dried *D. rotundata* leaves as described (1). Libraries for PE short reads were constructed using an Illumina TruSeq DNA LT Sample Prep Kit (Illumina). The PE library was sequenced on the Illumina Hiseq4000 platform. A summary of sequence and alignment information is provided in Table SM7 (attached at the bottom of this file).

### **S2.3 Quality control and alignment**

We used FaQCs v2.08 (9) to remove unpaired reads and adapters. We then filtered out reads shorter than 75 bases or those whose average read quality score was 20 or lower with prinseq-lite v0.20.4 lite (16). We also trimmed bases whose average read quality score was below 20 from the 5' end and the 3' end using the sliding window approach (the window size was five bases, and the step size was one base) in prinseq-lite (16). Subsequently, we aligned the filtered reads of P1, P2, and F1 progenies to the newly assembled contigs (supplementary text S1) using the bwa mem command in BWA (6). After sorting the BAM files, we only retained properly paired and uniquely mapped reads using SAMtools (7).

### **S2.4 Identification of parental line-specific heterozygous markers**

#### ***SNP-type heterozygous markers***

SNP-based genotypes for P1, P2, and F1 progenies were obtained as a VCF file. The VCF file was generated as follows: (i) SAMtools v1.5 (7) mpileup command with the option “-t DP,AD,SP -B -Q 18 -C 50”; (ii) BCFtools v1.5 (17) call command with the option “-P 0 -v -m -f GQ,GP”; (iii)

BCFtools (17) view command with the options “-i 'INFO/MQ $\geq$ 40, INFO/MQ0F $\leq$ 0.1, and AVG(GQ) $\geq$ 10”; and (iv) BCFtools (17) norm command with the option “-m+any” (Fig. SM2). We rejected the variants with low read depth ( $<10$ ) or low genotype quality scores ( $<10$ ) in the two parents. We regarded variants with low read depth ( $<8$ ) or low genotype quality scores ( $<5$ ) in F1 progenies as missing and only retained the variants with low missing rates ( $<0.3$ ).

Subsequently, only bi-allelic SNPs were selected by the BCFtools (17) view command with the option “-m 2 -M 2 -v snps”. Referring to the genotypes in the VCF file, heterozygous genotypes called by unbalanced allele frequency (out of 0.4-0.6 in two parents, and out of 0.2-0.8 in F1 progenies) were regarded as missing, and filtering for missing rate ( $<0.3$ ) was applied again. Finally, a binomial test was performed to reject SNPs affected by segregating distortion in the F1 progenies. This binomial test assumes that the probability of success rate is 0.5 based on the two-side hypothesis, and we regarded variants having  $p$ -value less than 0.2 as segregation distortion.

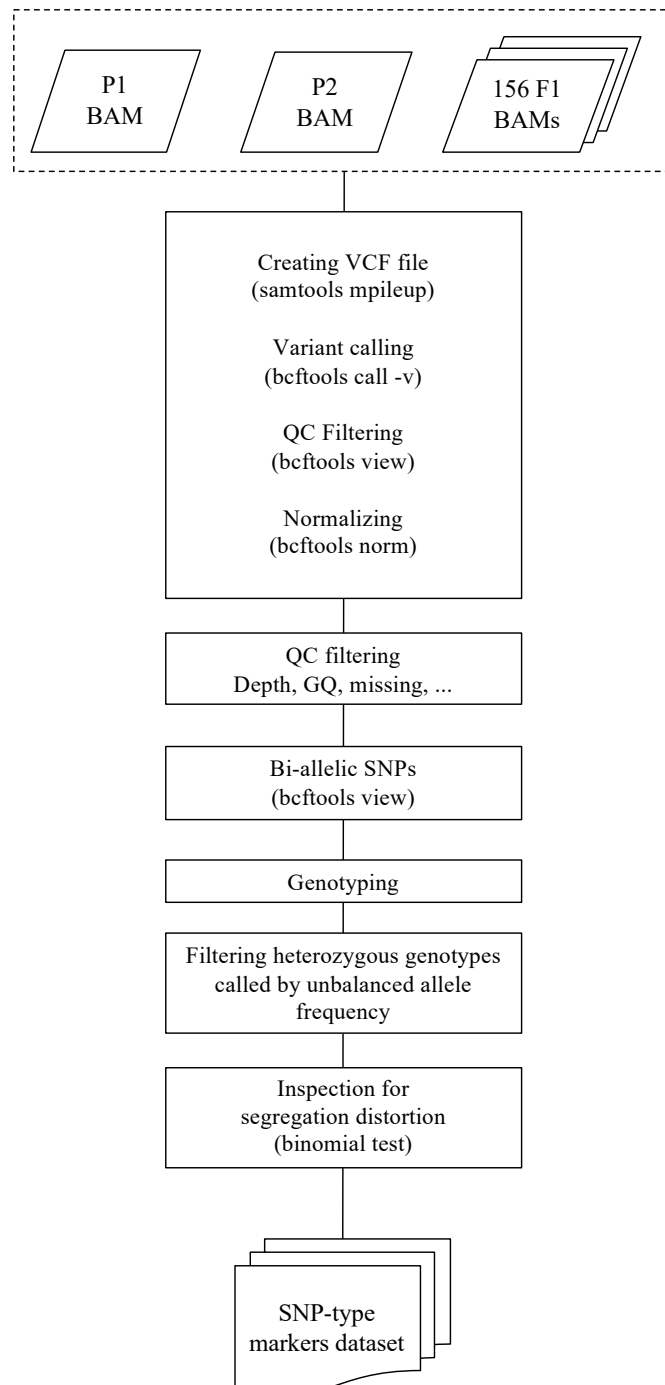

**Fig. SM2. Flowchart of SNP-type heterozygous marker selection.**

**Presence/absence-type heterozygous markers.**

A VCF file was generated to search for positions with contrasting read depth between the two parental plants P1 and P2 using the following commands: (i) SAMtools (7) mpileup command with the option “-B -Q 18 -C 50”; (ii) BCFtools (17) call command with the option “-A”; and (iii) BCFtools (17) view command with the options “-i 'MAX(FMT/DP)≥8 and MIN(FMT/DP)≤0' -g miss -V indels”. This means that one of the parents (P1 or P2) has enough read depth (≥8) and another parent has no reads aligned on that region (A in Fig. SM3). Subsequently, we converted continuous positions in the VCF file to a feature that provides the start and end coordinate information of a region using the BEDTools v.2.26 (18) merge command with the option “-d 10 -c 1 -o count”. We only retained sufficiently wide features (≥50 bp) in the BED file (the 1st BED). To reject false positives whereby low-depth regions are erroneously regarded as absent regions, we focused on both the boundary regions around each feature and the features themselves. For boundary regions, the 2nd BED file including expanded (twice-sized) features of each feature given in the 1st BED was generated with the BEDTools (18) slop command with the option “-b 0.5 -pct”.

Using the depth value in each feature given in the 1st BED, presence/absence-based genotypes for parental plants P1 and P2 and F1 progenies were determined. To verify the rejection of false-positive features, we also referred to the depth values in the boundary regions around each feature. Verified features were only accepted as presence/absence markers. The depth values in each feature were calculated with the SAMtools (7) bedcov command with the option “-Q 0”. Also, the depth values in the boundary regions were obtained by subtracting the depth values of the 2nd BED from that of the 1st BED (B in Fig. SM3). For P1 and P2, we regarded genotypes having depth ≥ 8 as present genotypes, meaning the heterozygosity of present and absent, while those having depth < 2 were classified as absent genotypes, meaning the homozygosity of absent. For F1 progenies, we classified markers with depth > 0 and = 0 as present and absent markers, respectively. Finally, we applied the same binomial test for SNP-type heterozygous markers as that used for presence/absence-type heterozygous markers.

**A**

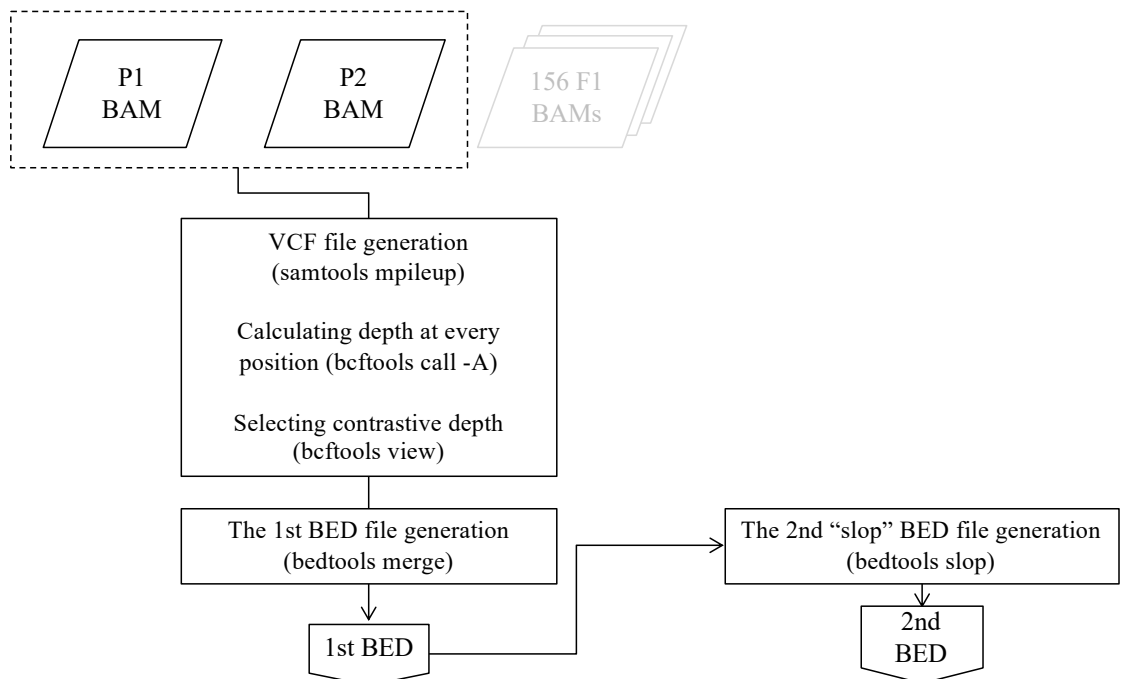

(continued)

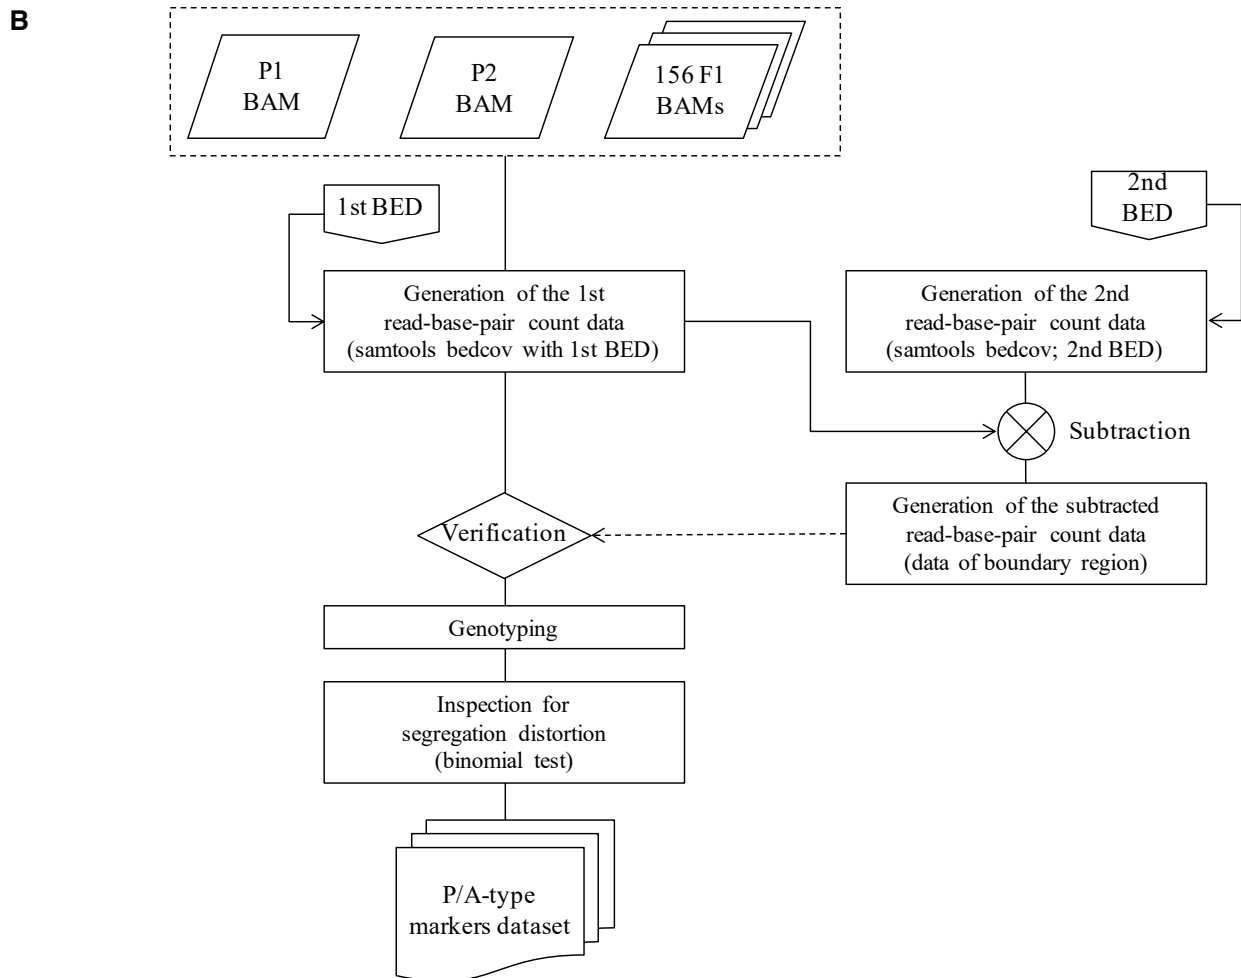

**Fig. SM3. Flowchart of presence/absence-type heterozygous marker selection.**

**Integration of SNP-type and presence/absence-type heterozygous markers.** To develop parental line-specific linkage maps, we integrated SNP-type and P/A-type (presence/absence-type) heterozygous markers. Two types of markers were defined: Type-1 markers and Type-2 markers. If an SNP-type marker was heterozygous in P1 but homozygous in P2 or if a P/A-type marker was present in P1 and absent in P2, it was classified as a Type-1 marker (P1-heterozygous marker set). Conversely, if a SNP-type marker was homozygous and heterozygous in P1 and P2, respectively, or if a P/A-type marker was absent in P1 but present in P2, it was classified as a Type-2 marker (P2-heterozygous marker set).

### **S2.5 Anchoring and ordering contigs**

**Pruning and flanking markers based on Spearman's correlation coefficients.** Distance matrices of Spearman's correlation coefficients ( $\rho$ ) were calculated for every marker pair in each contig in each marker set (P1-heterozygous marker set and P2-heterozygous marker set). According to the histogram of absolute  $\rho$  calculated from each contig, most markers on the same contigs were correlated with each other (Fig. SM4). Therefore, we pruned correlated flanking markers to remove redundant markers (Fig. SM5). Accordingly, we obtained 11,389 markers for linkage mapping (Table SM8).



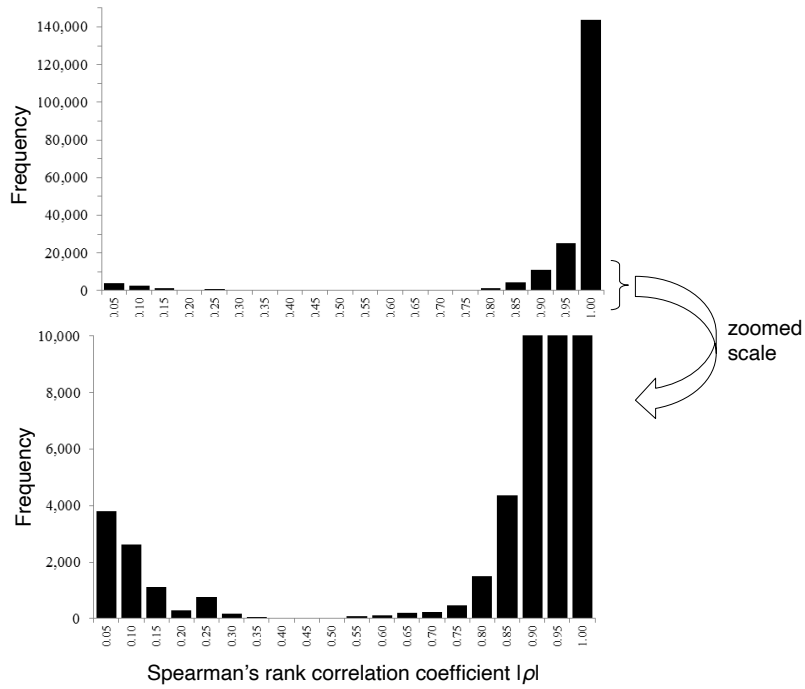

**Fig. SM4. Histogram of absolute  $\rho$  values calculated from each contig.**

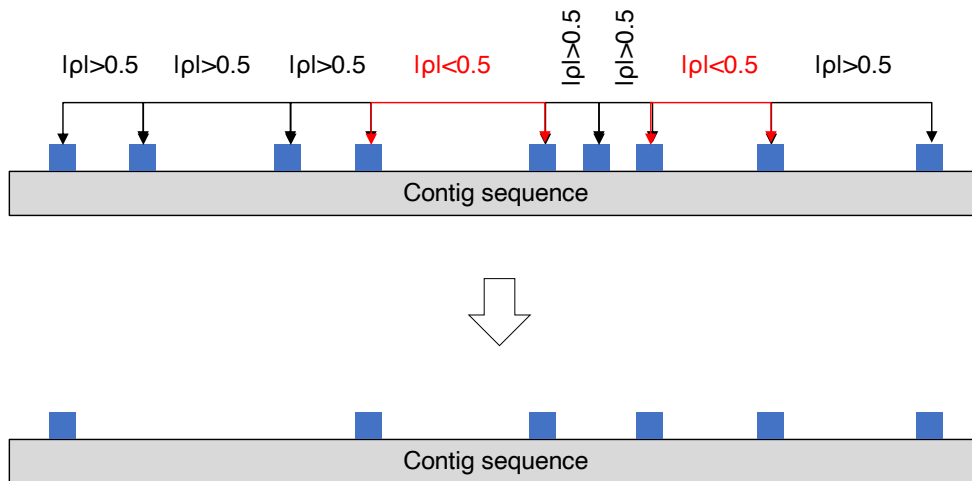

**Fig. SM5. The process used to prune correlated flanking markers.**

**Table SM8. Summary of the anchoring markers.**

|                                                           | Type1 | Type2 | Type1 + Type2 |
|-----------------------------------------------------------|-------|-------|---------------|
| <b>Total anchoring markers to generate linkage groups</b> | 7,020 | 4,369 | 11,389        |
| - SNP                                                     | 4,607 | 3,435 | 8,042         |
| - P/A                                                     | 2,413 | 934   | 3,347         |
| Total base pairs of linkage group having markers (Mbp)    | 434.7 | 328.4 | 495.2         |
| Total anchored base pairs estimated from genome size (%)  | 75.5  | 56.7  | 85.5          |

**Linkage mapping.** The markers obtained as described in the previous section were converted to genotype-formatted data. Based on this genotype-formatted data, genetic linkage maps were constructed using MSTmap (19) with the following parameters: “population\_type DH; distance\_function kosambi; cut\_off\_p\_value 0.00000000001; no\_map\_dist 15.0; no\_map\_size 0; missing\_threshold 25.0; estimation\_before\_clustering no; detect\_bad\_data no; objective\_function ML” for each marker set. After trimming the orphan linkage groups, we solved the complemented-phased duplex linkage groups caused by coupling-type and repulsion-type markers in the pseudo-testcross method. Finally, two parental-specific linkage maps were constructed. These two linkage maps were designated as P1-map (constructed using Type-1 markers) and P2-map (constructed using Type-2 markers) (Fig SM6 and Fig SM7). The linkage groups were visualized by R/qtl (20). The numbering of linkage groups is the same as that used in the previous reference genome (1).

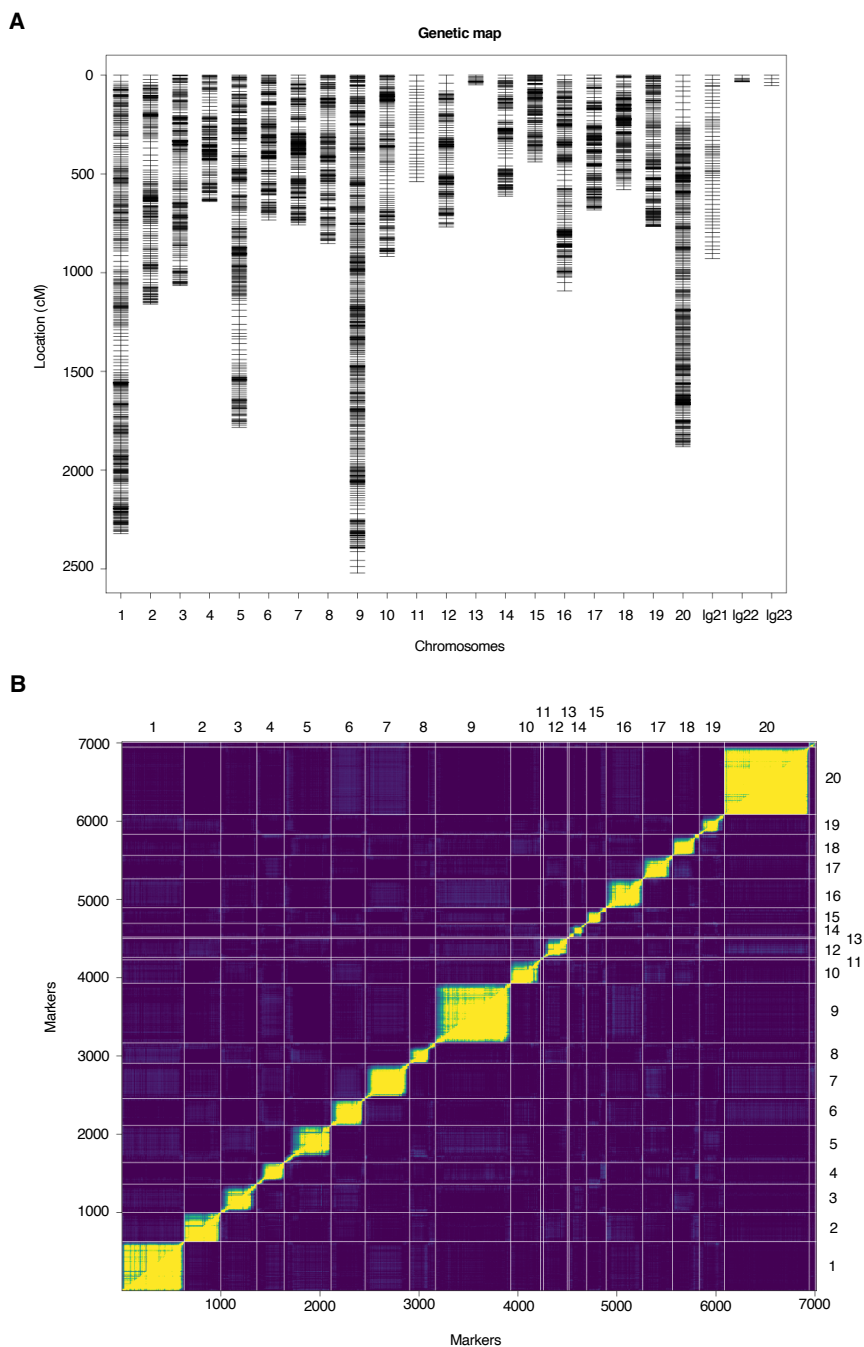

**Fig. SM6. P1-map created using P1 heterozygous markers.** (A) Contig positions in the P1-map. (B) Estimated recombination fractions (upper-left triangle) against LOD score (lower-right triangle) plotted by R/qtl (20).

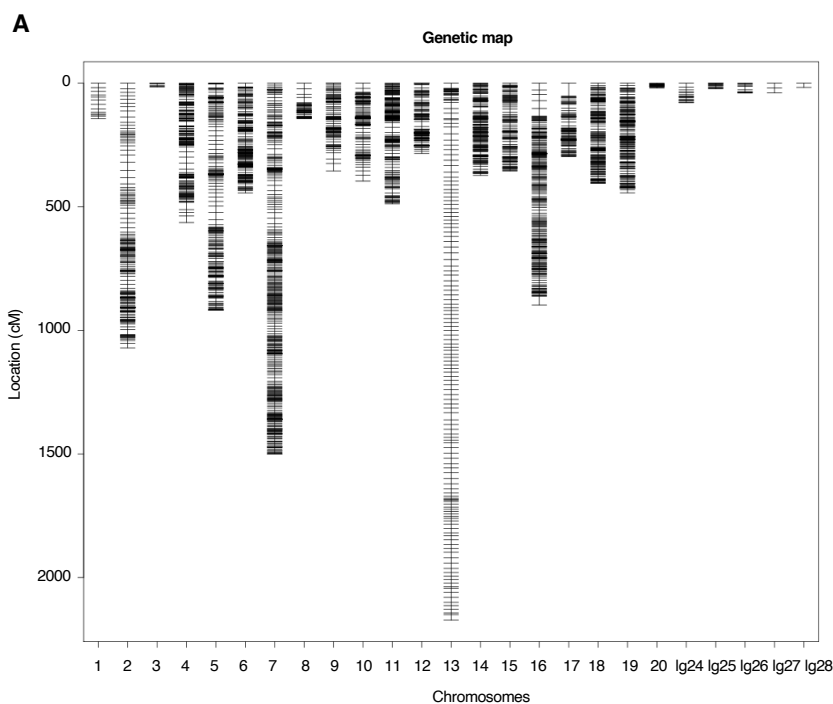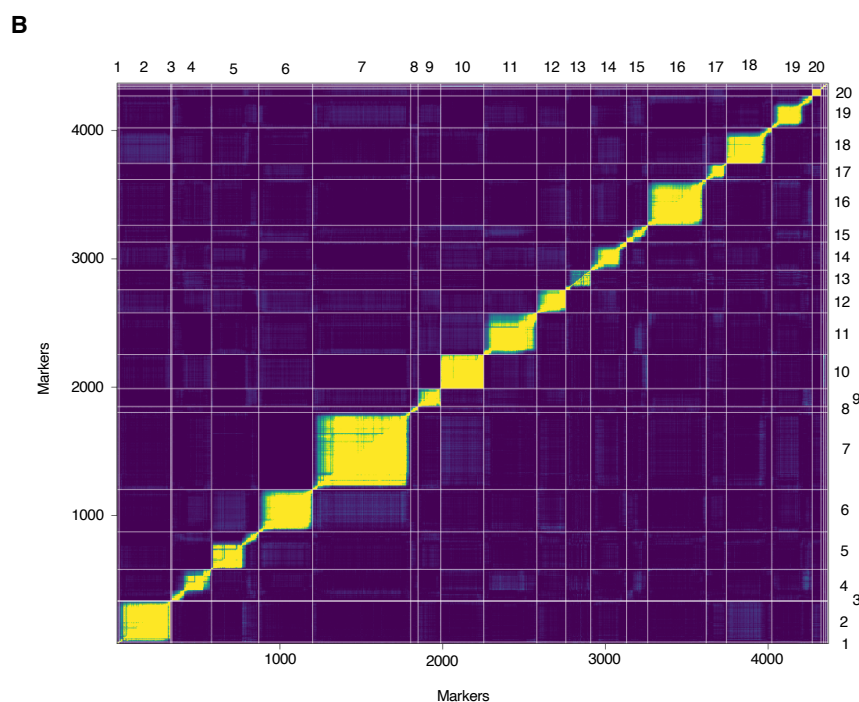

**Fig. SM7. P2-map created using P2 heterozygous markers.** (A) Contig positions in the P2-map. (B) Estimated recombination fractions (upper-left triangle) against LOD score (lower-right triangle) plotted by R/qtl (20).

**Integration of two parental-specific linkage maps into the chromosome-scale physical genome sequence.** Based on a matrix derived from the contigs shared between the P1- and P2-maps, i.e., linkage groups (Table SM9), the contigs were anchored and linearly ordered as pseudo-chromosomes. During the anchoring and ordering process, we identified contigs whose

markers were allocated to different linkage groups. Such contigs were further divided into sub-contigs to ensure that they were not allocated to different pseudo-chromosomes. We divided the contigs at the proper positions as described previously (1). During this procedure, 34 genes including 61 transcript variants were cut and removed. Finally, a previously described method (1) was followed to generate the pseudo physical genome sequence composed of 20 pseudo-chromosomes. To compare the newly generated pseudo-chromosomes with the ones we constructed previously (1), we generated a dot plot with D-Genies (21) (Fig. SM8) and counted the anchored base pairs in the new pseudo-chromosomes (Table SM10). The resulting reference genome, including unanchored contigs, was uploaded to ENSEMBL ([http://plants.ensembl.org/Dioscorea\\_rotundata/Info/Index](http://plants.ensembl.org/Dioscorea_rotundata/Info/Index)).

**Table SM9. A matrix of the number of shared contigs between the P1-map and P2-map. Linkage groups (lg) 21-28 do not have shared contigs.**

|        |    | P2-map |     |   |    |     |     |     |    |    |    |    |    |    |     |    |    |     |    |     |    |      |      |      |      |      |
|--------|----|--------|-----|---|----|-----|-----|-----|----|----|----|----|----|----|-----|----|----|-----|----|-----|----|------|------|------|------|------|
|        |    | 1      | 2   | 3 | 4  | 5   | 6   | 7   | 8  | 9  | 10 | 11 | 12 | 13 | 14  | 15 | 16 | 17  | 18 | 19  | 20 | lg24 | lg25 | lg26 | lg27 | lg28 |
| P1-map | 1  | 5      | 2   | 1 | 2  | 0   | 3   | 2   | 0  | 0  | 3  | 2  | 1  | 0  | 1   | 0  | 5  | 0   | 2  | 0   | 1  | 0    | 0    | 0    | 0    |      |
|        | 2  | 0      | 120 | 0 | 1  | 2   | 2   | 3   | 0  | 1  | 1  | 1  | 0  | 0  | 0   | 0  | 1  | 0   | 1  | 2   | 0  | 0    | 0    | 0    | 0    |      |
|        | 3  | 0      | 2   | 3 | 1  | 0   | 3   | 9   | 0  | 1  | 0  | 0  | 0  | 0  | 0   | 0  | 1  | 0   | 1  | 2   | 0  | 0    | 0    | 0    | 2    |      |
|        | 4  | 0      | 0   | 0 | 84 | 2   | 0   | 1   | 0  | 0  | 0  | 0  | 0  | 0  | 3   | 0  | 1  | 0   | 0  | 0   | 0  | 0    | 0    | 0    | 0    |      |
|        | 5  | 0      | 1   | 0 | 3  | 133 | 2   | 3   | 0  | 1  | 1  | 2  | 2  | 0  | 4   | 1  | 0  | 1   | 1  | 2   | 0  | 0    | 0    | 0    | 0    |      |
|        | 6  | 0      | 0   | 0 | 0  | 3   | 128 | 2   | 0  | 1  | 1  | 2  | 0  | 0  | 1   | 0  | 2  | 0   | 0  | 2   | 0  | 0    | 0    | 0    | 0    |      |
|        | 7  | 0      | 2   | 0 | 1  | 2   | 2   | 199 | 0  | 1  | 1  | 3  | 0  | 0  | 0   | 1  | 1  | 0   | 0  | 3   | 0  | 0    | 0    | 0    | 0    |      |
|        | 8  | 0      | 0   | 0 | 1  | 1   | 4   | 1   | 24 | 0  | 0  | 0  | 0  | 0  | 0   | 1  | 4  | 1   | 2  | 1   | 0  | 9    | 0    | 0    | 0    |      |
|        | 9  | 0      | 1   | 0 | 0  | 2   | 4   | 4   | 0  | 71 | 4  | 1  | 0  | 0  | 2   | 1  | 5  | 1   | 0  | 1   | 0  | 0    | 0    | 0    | 0    |      |
|        | 10 | 0      | 1   | 0 | 0  | 0   | 0   | 1   | 0  | 0  | 93 | 1  | 1  | 0  | 1   | 1  | 0  | 1   | 0  | 0   | 0  | 6    | 0    | 0    | 0    |      |
|        | 11 | 0      | 0   | 0 | 0  | 0   | 0   | 1   | 0  | 0  | 0  | 8  | 0  | 0  | 0   | 0  | 0  | 0   | 1  | 0   | 0  | 0    | 0    | 0    | 0    |      |
|        | 12 | 0      | 0   | 0 | 0  | 2   | 0   | 1   | 0  | 0  | 2  | 2  | 75 | 1  | 0   | 1  | 2  | 0   | 5  | 0   | 0  | 0    | 0    | 0    | 0    |      |
|        | 13 | 0      | 0   | 0 | 0  | 0   | 0   | 1   | 0  | 0  | 0  | 0  | 0  | 5  | 0   | 0  | 0  | 0   | 0  | 0   | 0  | 0    | 0    | 0    | 0    |      |
|        | 14 | 0      | 0   | 0 | 2  | 1   | 1   | 1   | 0  | 0  | 2  | 0  | 0  | 1  | 66  | 0  | 0  | 1   | 0  | 1   | 1  | 0    | 0    | 0    | 0    |      |
|        | 15 | 0      | 0   | 0 | 0  | 0   | 0   | 0   | 0  | 1  | 0  | 1  | 0  | 0  | 2   | 43 | 2  | 0   | 0  | 1   | 0  | 0    | 0    | 0    | 0    |      |
|        | 16 | 0      | 1   | 0 | 0  | 2   | 0   | 2   | 0  | 1  | 1  | 0  | 0  | 0  | 126 | 1  | 1  | 0   | 0  | 0   | 0  | 0    | 0    | 0    | 0    |      |
|        | 17 | 0      | 0   | 0 | 1  | 2   | 1   | 1   | 0  | 0  | 1  | 0  | 1  | 1  | 1   | 2  | 60 | 0   | 0  | 0   | 0  | 0    | 0    | 0    | 0    |      |
|        | 18 | 0      | 1   | 0 | 0  | 0   | 2   | 1   | 0  | 0  | 1  | 2  | 1  | 0  | 0   | 0  | 0  | 118 | 0  | 0   | 0  | 0    | 0    | 0    | 0    |      |
|        | 19 | 0      | 1   | 0 | 0  | 0   | 1   | 2   | 0  | 0  | 0  | 2  | 0  | 4  | 0   | 0  | 0  | 0   | 1  | 100 | 0  | 0    | 0    | 0    | 0    |      |
|        | 20 | 1      | 8   | 0 | 0  | 5   | 1   | 4   | 0  | 0  | 5  | 6  | 2  | 3  | 2   | 0  | 4  | 1   | 1  | 0   | 39 | 0    | 0    | 3    | 0    |      |
| lg21   | 0  | 0      | 0   | 0 | 0  | 0   | 1   | 0   | 0  | 0  | 0  | 0  | 1  | 0  | 0   | 0  | 0  | 0   | 0  | 0   | 0  | 0    | 0    | 0    |      |      |
| lg22   | 0  | 0      | 0   | 0 | 0  | 0   | 0   | 0   | 0  | 0  | 6  | 0  | 0  | 0  | 0   | 0  | 0  | 0   | 0  | 0   | 0  | 0    | 0    | 0    |      |      |
| lg23   | 0  | 0      | 0   | 0 | 0  | 0   | 0   | 0   | 0  | 0  | 1  | 0  | 0  | 0  | 0   | 0  | 0  | 0   | 0  | 0   | 0  | 0    | 0    | 0    |      |      |

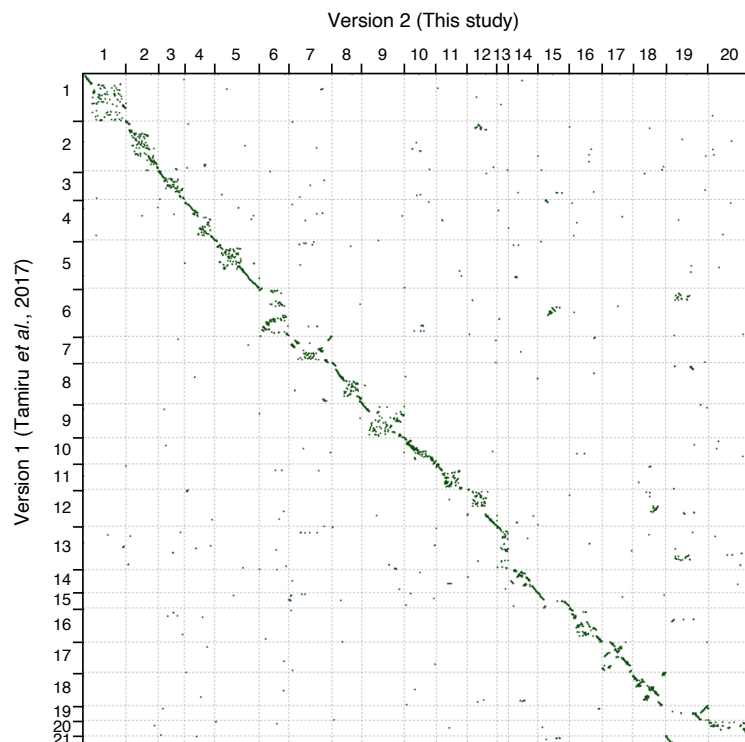

**Fig. SM8. Dot plot of the new pseudo-chromosomes (Ver. 2) against the previously generated pseudo-chromosomes (Ver. 1) (1).**

**Table SM10. Comparison of the old (Ver. 1) (*I*) and new (Ver. 2) pseudo-chromosomes.**

| <b>Feature</b>                                  | <b>Ver. 1</b> | <b>Ver. 2</b> |
|-------------------------------------------------|---------------|---------------|
| Number of Pseudo Chr.                           | 21            | 20            |
| Total size of Pseudo Chr. (Mbp)                 | 456.67        | 491.97        |
| Total not ‘N’ Mbp                               | 406.1         | 487.31        |
| Total size of Pseudo Chr. / Total scaffold* (%) | 76.9          | 84.9          |
| Complete BUSCOs (%)                             | 82.8%         | 82.3%         |

\*In version2, contigs were used instead of scaffolds.

### **S3. Genetic diversity analysis**

#### **S3.1 Whole-genome resequencing of Guinea yam accessions**

For genetic diversity analysis, we selected 333 accessions of *D. rotundata* maintained at IITA, Nigeria, representing the genetic diversity of Guinea yam landraces and improved lines of West Africa. We extracted DNA from dried leaves of each *D. rotundata* accession as described (*I*). Libraries for PE short reads were constructed using an Illumina TruSeq DNA LT Sample Prep Kit (Illumina). The PE library was sequenced on the Illumina Nextseq500 or Hiseq4000 platform. Finally, P1 (TDr04/219) and P2 (TDr97/777) parents used to anchor the contigs and the reference individual “TDr96\_F1” were added to the 333 accessions. Therefore, we used a total of 336 accessions for this analysis. A summary of the sequences and alignments is provided in Dataset S1.

#### **S3.2 Quality control, alignment, and SNP calling**

We used FaQCs v2.08 (*9*) and prinseq-lite v0.20.4 lite (*16*) for quality control. We used the same parameters provided in supplementary text S2.3, but both paired and unpaired reads were aligned to the new reference genome using the bwa mem command in BWA (*6*) with option “-a”. After sorting the BAM files, the VCF file was generated using the SAMtools (*7*) mpileup command with the option “-t DP,AD,SP -B -Q 18 -C 50”, and variants were called by the BCFtools (*17*) call command with the option “-P 0 -v -m -f GQ,GP”. Low-quality variants were rejected using the BCFtools (*17*) view command with the options “-i 'INFO/MQ $\geq$ 40, INFO/MQ0F $\leq$ 0.1, and AVG(GQ) $\geq$ 5””. We regarded variants with low read depth (<8) or low genotype quality score (<5) as missing, filtered out SNPs with high missing rates ( $\geq$ 0.3) across all samples, and only retained bi-allelic SNPs on the pseudo-chromosomes.

#### **S3.3 Unsupervised clustering analysis**

Through the pipeline described in supplementary text S3.2, 6,124,093 SNPs were retained in 336 Guinea yam accessions. The VCF file including 336 Guinea yam accessions was converted into a GDS file with the gdsfmt v1.20 R package implemented in the SNPRelate v1.18 (*22*) R package. We then ran SNPRelate (*22*) without filtering for principal component analysis (PCA). Moreover, we used sNMF v1.2 (*23*) for admixture analysis of the 336 Guinea yam accessions. To choose the best *K* value, we launched sNMF (*23*) for each *K* value from 2 to 20 (Fig. SM9). We could not find the best *K* value based on the cross-entropy criterion, so we defined five clusters for convenience.

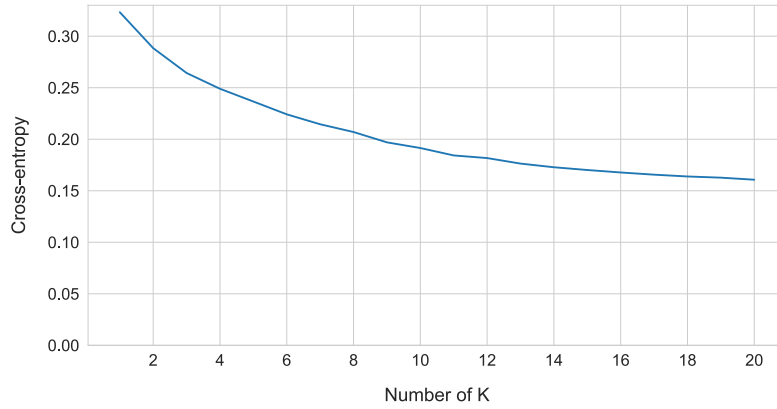

**Fig. SM9. Cross-entropy values from  $K=1$  to  $K=20$  for admixture analysis.**

### **S3.4 Polymorphism and ploidy of nuclear genomes**

**Heterozygosity level and unique alleles.** First, we calculated the heterozygosity level in each accession (Fig. S2). We defined the heterozygosity level as follows:

$$(\text{Heterozygosity level}) = \frac{S}{L}$$

where  $S$  is the number of heterozygous SNPs and  $L$  is the total number of mapped sites in an accession. The heterozygosity levels of each cluster were statistically compared by two-tailed Student t test (Table S2). Second, we counted the unique alleles in each cluster (Fig. S3). An allele was considered unique if it only existed in a cluster even when the allele was a singleton in all accessions.

#### ***Flow cytometry.***

Ploidy level was estimated by flow cytometry using a Partec Ploidy Analyzer (Sysmex Partec, Gorlitz, Germany). Fully developed fresh young leaves were sampled and chopped with a razor blade (ca. 5 x 5 mm) in 0.4 mL nuclear extraction buffer (solution A of a High-resolution kit; Sysmex Partec, Gorlitz, Germany). The suspension was filtered through a nylon filter (50- $\mu\text{m}$  mesh), and the extracted nuclei were stained with 4',6-diamino-2-phenylindole solution. After 5 min of incubation at room temperature, the sample was examined in a ploidy analyzer at a rate of 5–20 nuclei/s. The DNA index (DI) of each accession was calculated based on the relative amount of DNA in nuclei at the G1 stage compared to the internal standard. Rice (*Oryza sativa* L.) was used as an internal standard for calibration of the measurements. Flow cytometry was repeated two or three times with different leaf samples to confirm the DI of each accession. The ploidy levels of each accession were determined by comparing their DI with that of the diploid accession “TDr1673”, for which the chromosome number was confirmed microscopically to be  $2n = 40$ . (Dataset S1)

**Summary statistics of population genetics.** After removing the triploid accessions of cluster 1, we imputed missing genotypes using BEAGLE v4.1 (24) with default options. We then calculated the summary statistics of population genetics (Table S3). First, we counted segregating sites and singletons in 308 Guinea yam accessions. We also estimated Watterson’s  $\theta$  ( $\hat{\theta}_W$ ) (25), pairwise nucleotide diversity ( $\hat{\theta}_\pi$ ) (26), and Tajima’s  $D$  (27) in the same dataset. We defined  $\hat{\theta}_W$  as follows:

$$\hat{\theta}_w = \frac{S}{a * \bar{L}}$$

where  $a$  is equal to:

$$a = \sum_{i=1}^{n-1} \frac{1}{i}$$

and  $\bar{L}$  is the number of average mapped sites in a population and  $n$  is the number of sequences. We also defined  $\hat{\theta}_\pi$  as:

$$\hat{\theta}_\pi = \frac{1}{\bar{L}} \frac{n}{n-1} \frac{\sum_{i<j} k_{ij}}{n(n-1)/2}$$

where  $\bar{L}$  is the number of average mapped sites in a population,  $n$  is the number of sequences, and  $k_{ij}$  is the number of nucleotide differences between the  $i$ th and  $j$ th sequences.

We also calculated LD decay of 308 Guinea yam accessions (Fig. S4). The SNPs whose minor allele frequencies less than 0.05 were removed from the above SNP set used to calculate  $\theta$ . LD decay was calculated with 200-kb window and 100-kb step. Ten SNPs were randomly sampled within a window, and all possible combinations of  $r^2$  were calculated using the sampled SNPs within a window.

## S4. Phylogenomic analysis of African yam

### S4.1 Data preparation

For phylogenomic analysis of African yam, we used 308 Guinea yam accessions sequenced in the present study (excluding cluster 1 triploid accessions), as well as 80 *D. rotundata*, 29 *D. abyssinica*, 21 Western *D. praehensilis*, and 18 Cameroonian *D. praehensilis* accessions that were sequenced in a previous study (28) using two accessions of the Asian species *D. alata* as an outgroup (Table SM11). Of the samples sequenced in the previous study (28), we only used sequences whose species labels matched a species predicted by admixture analysis in the previous study (28). Also, we removed the sequences that were labeled as hybrids in the previous study (28). Two sequences of *D. alata* downloaded from NCBI were used as the outgroup (Table SM11). Subsequently, read quality control, alignment, and SNP calling of these 458 sequences were conducted using the pipeline described in supplementary text S3.2. Except for the Neighbor-joining (NJ) tree (29) (supplementary text S4.2), we only used SNPs with a missing rate  $< 0.3$  in each targeted species. When the markers were polarized by comparison with the *D. alata* outgroup, the SNPs at positions where the alleles of *D. alata* were not completely fixed or where either of the *D. alata* sequences was missing were filtered out.

### S4.2 Neighbor-joining tree

Before constructing the NJ tree (29), we only retained SNPs at positions with no missing data across all five species (*D. rotundata*, *D. abyssinica*, Western *D. praehensilis*, Cameroonian *D. praehensilis*, and *D. alata*). When we converted the VCF file including the remaining SNPs to a multi-FASTA file, heterozygous SNPs were converted to IUPAC code to characterize them as ambiguous markers. To construct the NJ tree (29), we ran MEGA X v10.1.8 (30) using the 463,293 remaining SNPs. In MEGA X (30), the bootstrap value was set to 100 and the other parameters were set as default. Finally, the NJ tree was drawn with GGTREE v2.0.4 (31).

### S4.3 Inferring the evolutionary history of wild *Dioscorea* species using $\partial a \partial i$



To elucidate the evolutionary relationships of the three wild *Dioscorea* species, *D. abyssinica* (indicated as A), Western *D. praehensilis* (P), and Cameroonian *D. praehensilis* (C), which are closely related to *D. rotundata*, we performed  $\partial a\partial i$  analysis (32). This technique allows evolutionary parameters to be estimated based on an unfolded site frequency spectrum. The joint unfolded site frequency spectrum was calculated based on the 17,532 polarized SNPs and was projected down to 25 chromosomes in each species.

First, three phylogenetic models,  $\{\{A, P\}, C\}$ ,  $\{\{P, C\}, A\}$ , and  $\{\{C, A\}, P\}$ , were tested without considering migration among the species. The parameter bounds of each population size ranged from  $10^{-3}$  to 100, and those of each divergence time ranged from 0 to 3, as suggested in the  $\partial a\partial i$  manual (<https://dadi.readthedocs.io/en/latest/>). The grid size was set to (40, 50, 60). The maximum iteration for an inference was set to 20. Randomly perturbing the initial values using the ‘perturb\_params’ function in  $\partial a\partial i$  (32), the parameters were inferred 100 times. Under these conditions, the  $\{\{A, P\}, C\}$  model had the highest likelihood out of the three models (Table S4).

Based on the assumption that  $\{\{A, P\}, C\}$  represents the true evolutionary relationship among the three wild *Dioscorea* species, the evolutionary parameters were re-estimated by  $\partial a\partial i$  (32), allowing symmetric migration among the species. The parameter bounds of each symmetric migration rate ranged from 0 to 20, as also suggested in the  $\partial a\partial i$  manual. The parameters were inferred 100 times by  $\partial a\partial i$  (32) with different initial parameters, and the best parameter set was selected based on Akaike information criterion.

#### **S4.4 Inferring the evolutionary history of wild *Dioscorea* species using fastsimcoal2**

To complement our results and to exactly replicate the conditions used in the previous report (28), fastsimcoal2 (33), which was used in the previous study (28), was also used to test these three models ( $\{\{A, P\}, C\}$ ,  $\{\{P, C\}, A\}$ , and  $\{\{C, A\}, P\}$ ). Until the SNP calling step, we basically followed our own pipeline in supplementary text S3.2 based on the reference genome version 1 including the unanchored contigs (1) to be consistent with the previous study (28). The misclassified samples excluding hybrids were genetically re-classified by admixture analysis following the methods used in the previous study (28). The threshold of missing rate across all samples was set to 0.25, as proposed in the previous study (28). We obtained 87,671 SNPs using our pipeline, fewer than the number of SNPs analyzed in the previous coalescent simulation (28). Therefore, we skipped the down-sampling of the SNPs to 100,000, unlike in the previous study (28). For the other steps and the parameter bounds for the coalescent simulation by fastsimcoal2 (33), we followed the method used in the previous study exactly (28) using the same version of fastsimcoal2 (33).

### **S5. Test of hybrid origin**

#### **S5.1 Site frequency spectrum polarized by two candidate progenitors of Guinea yam**

We focused on the allele frequencies of 388 *D. rotundata* sequences, including 80 from the previous study (28), at the SNPs positioned over the entire genome that are oppositely fixed in the two candidate progenitors. The SNP set was generated as described in supplementary text S4.1. Based on this SNP set, 144 SNPs were oppositely fixed in the two candidate progenitors across all pseudo-chromosomes; the allele frequencies of these 144 SNPs were calculated and plotted.

#### **S5.2 Inferring the domestication history of Guinea yam using $\partial a\partial i$**

To infer the domestication history of Guinea yam, we used  $\partial a\partial i$  (32). Using the 15,461 polarized SNPs generated by following the method in supplementary text S4.1, three phylogenetic models,  $\{\{A, R\}, P\}$ ,  $\{\{P, R\}, A\}$ , and  $\{\{A, R\}, \{P, R\}\}$  (hypothesis 1, 2, and 3 in Fig. 2A, respectively) were tested, considering symmetric migration among the species. The parameter bound for the admixed proportion from *D. abyssinica* ranged from 0 to 1. The other parameter bounds were the



same as in supplementary text S4.3. The maximum iteration for an inference was set to 20. The parameters were inferred 100 times by  $\partial a \partial i$  (32).

### **S5.3 Comparison of $F_{ST}$ on each chromosome among three African yams**

$F_{ST}$  (34) among the three species (*D. abyssinica*, [Western] *D. praehensilis*, and *D. rotundata*) was calculated in each chromosome. We estimated  $F_{ST}$  using the formula:

$$F_{ST} = \frac{H_T - H_S}{H_T}$$

where  $H_T$  and  $H_S$  are the expected heterozygosity in the total population and sub-divided population, respectively, which are equal to:

$$H_T = 2 \frac{f_{A1} + f_{A2}}{2} \left(1 - \frac{f_{A1} + f_{A2}}{2}\right)$$

$$H_S = \frac{2f_{A1}(1 - f_{A1}) + 2f_{A2}(1 - f_{A2})}{2} = f_{A1}(1 - f_{A1}) + f_{A2}(1 - f_{A2})$$

where  $f_{A1}$  and  $f_{A2}$  are the allele frequencies in each population (34). Finally, the calculated  $F_{ST}$  were averaged in each chromosome.

## **S6. Haplotype network analysis of the whole plastid genome**

The sample set used to construct the haplotype network of the whole plastid genome was the same as that used to construct the NJ tree (supplementary text S4.2). We aligned the 458 whole-genome sequences, together with the whole plastid genome of *D. rotundata* (1), to the newly improved reference genome of *D. rotundata*. We followed the pipeline described in supplementary text S3.2 for quality control and alignment. Because the plastid genome is haploid, the “--ploidy” option was set to 1 in the BCFtools call command (17) when SNPs were called. Singleton SNPs were removed as unreliable markers. SNPs with more than one low-quality genotype (GQ<127) across the samples were also removed as unreliable markers. We did not allow any missing data. Finally, a haplotype network was constructed using the retained 250 SNPs by the median joining network algorithm (35) implemented in PopART (36).

## **S7. Inferring the changes in population size**

To explore the changes in population sizes, the demographic history of African yams was re-inferred by  $\partial a \partial i$  (32) allowing migration. By fixing the parameters predicted in supplementary text S5.2 except for population sizes, we re-estimated each population size at the start and end points after the emergence of these species, assuming an exponential increase/decrease in population size. The parameter bounds of population sizes ranged from  $10^{-3}$  to 100, and the maximum iteration for an inference was set to 20. The parameters were inferred by  $\partial a \partial i$  100 times (32).

## **S8. Exploring the possibility of extensive introgression from *Dioscorea* species**

To explore the possibility of multiple introgressions from both parental wild yams, the  $f_4$  statistic (37, 38) was applied to the four clusters of *D. rotundata* excluding the cluster 1 triploid accessions. Here, calculation of the  $f_4$  statistic requires four populations:  $P_{R1}$  is the first cluster of *D. rotundata*,  $P_{R2}$  is the second cluster of *D. rotundata*,  $P_P$  is a population of (Western) *D. praehensilis*, and  $P_A$  is a population of *D. abyssinica*. We estimated  $\hat{f}_4(P_{R1}, P_{R2}, P_P, P_A)$  with the following formula using sliding window analysis with a window size of 250 kb and a step size of 25 kb:

$$\hat{f}_4(P_{R1}, P_{R2}, P_P, P_A) = (\hat{p}_{R1} - \hat{p}_{R2})(\hat{p}_P - \hat{p}_A)$$

where  $\hat{p}_j$  is the observed allele frequency in a window in population  $P_j$ .

In most windows,  $\hat{f}_4$  is close to zero, which means that the window has a concordant genealogy because the two clusters of *D. rotundata* have a small genetic distance (B in Fig. SM10). However, if these two clusters of *D. rotundata* have a large genetic distance and if one or both populations have a small genetic distance from a wild *Dioscorea* species, then  $\hat{f}_4$  skews from 0. Therefore, a locus having a skewed  $\hat{f}_4$  has a discordant genealogy (C or D in Fig. SM10). For  $P_P$  (the population of *D. praehensilis*) and  $P_A$  (the population of *D. abyssinica*), the samples sequenced in the previous study (28) were used (Table SM11), and the dataset was prepared as described in supplementary text S4.1. As the first screening, all possible combinations of the clusters of *D. rotundata*, excluding accessions in cluster 1, were used for  $P_{R1}$  and  $P_{R2}$  (Fig. SM11). In this analysis, we identified an extensive introgression around the *SWEETIE* gene (4.00 to 4.15 Mb on chromosome 17). Because clusters 2 and 5 have the same genealogy pattern around the *SWEETIE* gene, we merged them into one population ( $P_{25}$ ) and used this as  $P_{R1}$ . Because cluster 4 has the opposite genealogy pattern to  $P_{25}$  around the *SWEETIE* gene, we used  $P_4$  as  $P_{R2}$ . As a result,  $\hat{f}_4(P_{25}, P_4, P_P, P_A)$  was calculated for the second screening (Fig. 4). If a locus had  $|Z(f_4)| > 5$ , we regarded it as an outlier (red dots in Fig. 4B). To reveal the relationships of the *D. rotundata* accessions around the *SWEETIE* gene, a Neighbor-Net was constructed by SplitsTree v5.1.4 (39) using 308 *D. rotundata* accessions excluding the accessions in cluster 1, 29 *D. abyssinica* accessions, and 21 *D. praehensilis* accessions. A total 458 SNPs from the 4.00–4.15 Mb region on chromosome 17 were converted to multi-FASTA format. At that time, heterozygous genotypes were converted to IUPAC codes.

**A** Equation for  $f_4$

$$2f_4(P_{R_1}, P_{R_2}, P_P, P_A) = \mathbb{E}T_{R_1P} + \mathbb{E}T_{R_2A} - \mathbb{E}T_{R_1A} - \mathbb{E}T_{R_2P}$$

**B** Concordant genealogy of  $f_4$

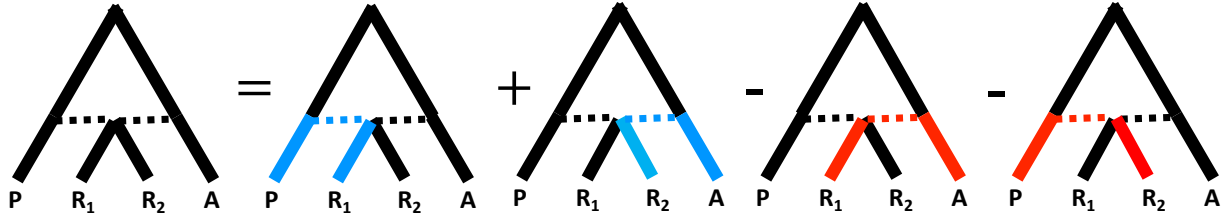

**C** Discordant genealogy of  $f_4$  (ABBA)

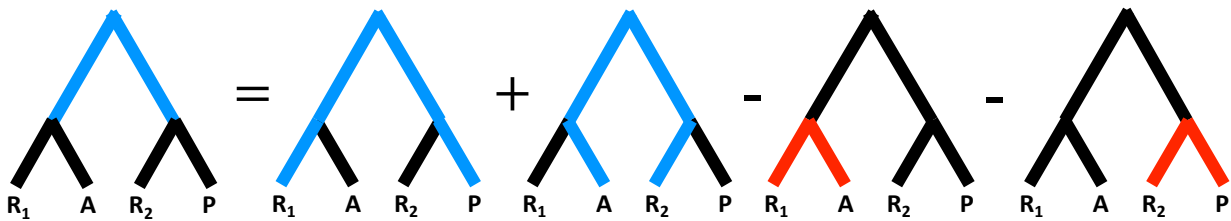

**D** Discordant genealogy of  $f_4$  (BABA)

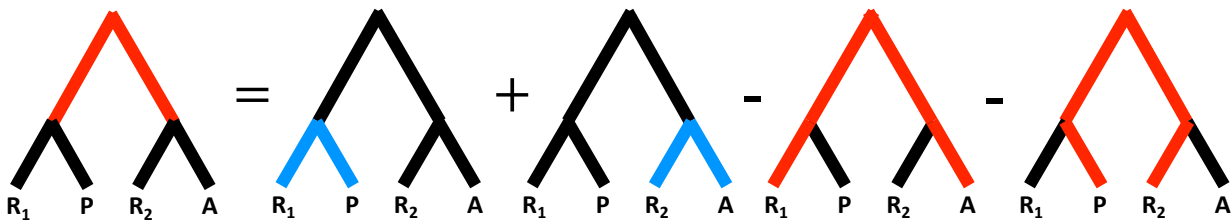

**Fig. SM10. Schematic explaining how  $f_4$  behaved in this study.** “A” represents the population of *D. abyssinica*. “P” represents the population of *D. praehensilis*. “R1” represents the first populations of *D. rotundata*. “R2” represents the second populations of *D. rotundata*. This figure was adapted from (38).

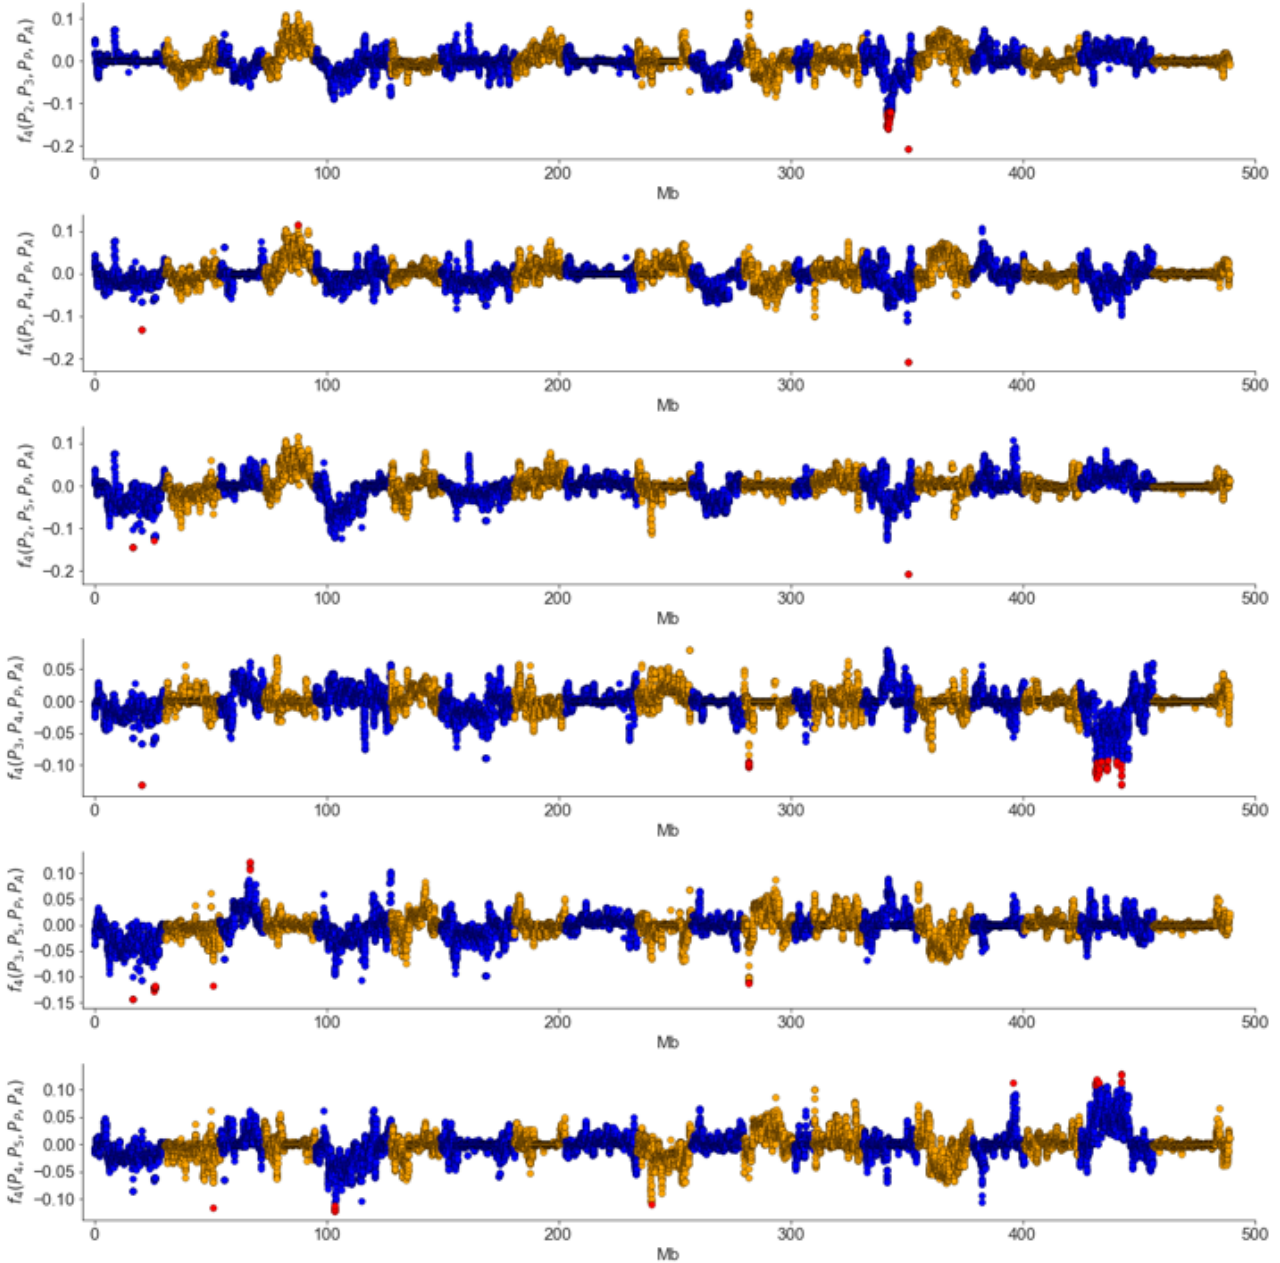

**Fig. SM11.**  $f_4$  in all possible combinations of clusters excluding cluster 1. Population  $P_i$  represents a population of the cluster  $i$ .

1. M. Tamiru, S. Natsume, H. Takagi, B. White, H. Yaegashi, M. Shimizu, K. Yoshida, A. Uemura, K. Oikawa, A. Abe, N. Urasaki, H. Matsumura, P. Babil, S. Yamanaka, R. Matsumoto, S. Muranaka, G. Girma, A. Lopez-Montes, M. Gedil, R. Bhattacharjee, M. Abberton, P. L. Kumar, I. Rabbi, M. Tsujimura, T. Terachi, W. Haerty, M. Corpas, S. Kamoun, G. Kahl, H. Takagi, R. Asiedu, R. Terauchi, Genome sequencing of the staple food crop white Guinea yam enables the development of a molecular marker for sex determination. *BMC Biol.* **15**, 86 (2017).
2. W. De Coster, S. D’Hert, D. T. Schultz, M. Cruts, C. Van Broeckhoven, NanoPack: visualizing and processing long-read sequencing data. *Bioinformatics.* **34**, 2666–2669 (2018).
3. M. Kolmogorov, J. Yuan, Y. Lin, P. A. Pevzner, Assembly of long, error-prone reads using repeat graphs. *Nat. Biotechnol.* **37**, 540–546 (2019).

4. F. A. Simão, R. M. Waterhouse, P. Ioannidis, E. V. Kriventseva, E. M. Zdobnov, BUSCO: assessing genome assembly and annotation completeness with single-copy orthologs. *Bioinformatics*. **31**, 3210–3212 (2015).
5. B. J. Walker, T. Abeel, T. Shea, M. Priest, A. Abouelliel, S. Sakthikumar, C. A. Cuomo, Q. Zeng, J. Wortman, S. K. Young, A. M. Earl, Pilon: An Integrated Tool for Comprehensive Microbial Variant Detection and Genome Assembly Improvement. *PLoS ONE*. **9**, e112963 (2014).
6. H. Li, R. Durbin, Fast and accurate short read alignment with Burrows-Wheeler transform. *Bioinformatics*. **25**, 1754–1760 (2009).
7. H. Li, B. Handsaker, A. Wysoker, T. Fennell, J. Ruan, N. Homer, G. Marth, G. Abecasis, R. Durbin, The Sequence Alignment/Map format and SAMtools. *Bioinformatics*. **25**, 2078–2079 (2009).
8. M. J. Roach, S. A. Schmidt, A. R. Borneman, Purge Haplotigs: allelic contig reassignment for third-gen diploid genome assemblies. *BMC Bioinform.* **19**, 460 (2018).
9. C.-C. Lo, P. S. G. Chain, Rapid evaluation and quality control of next generation sequencing data with FaQCs. *BMC Bioinform.* **15**, 366 (2014).
10. D. Kim, B. Langmead, S. L. Salzberg, HISAT: a fast spliced aligner with low memory requirements. *Nat. Methods*. **12**, 357–360 (2015).
11. M. Pertea, G. M. Pertea, C. M. Antonescu, T.-C. Chang, J. T. Mendell, S. L. Salzberg, StringTie enables improved reconstruction of a transcriptome from RNA-seq reads. *Nat. Biotechnol.* **33**, 290–295 (2015).
12. Y. S. Niknafs, B. Pandian, H. K. Iyer, A. M. Chinnaiyan, M. K. Iyer, TACO produces robust multisample transcriptome assemblies from RNA-seq. *Nat. Methods*. **14**, 68–70 (2017).
13. H. Iwata, O. Gotoh, Benchmarking spliced alignment programs including Spaln2, an extended version of Spaln that incorporates additional species-specific features. *Nucleic Acids Res.* **40**, e161 (2012).
14. P. Jones, D. Binns, H.-Y. Chang, M. Fraser, W. Li, C. McAnulla, H. McWilliam, J. Maslen, A. Mitchell, G. Nuka, S. Pesseat, A. F. Quinn, A. Sangrador-Vegas, M. Scheremetjew, S.-Y. Yong, R. Lopez, S. Hunter, InterProScan 5: genome-scale protein function classification. *Bioinformatics*. **30**, 1236–1240 (2014).
15. C. Camacho, G. Coulouris, V. Avagyan, N. Ma, J. Papadopoulos, K. Bealer, T. L. Madden, BLAST+: architecture and applications. *BMC Bioinformatics*. **10**, 421 (2009).
16. R. Schmieder, R. Edwards, Quality control and preprocessing of metagenomic datasets. *Bioinformatics*. **27**, 863–864 (2011).
17. H. Li, A statistical framework for SNP calling, mutation discovery, association mapping and population genetical parameter estimation from sequencing data. *Bioinformatics*. **27**, 2987–2993 (2011).
18. A. R. Quinlan, I. M. Hall, BEDTools: a flexible suite of utilities for comparing genomic features. *Bioinformatics*. **26**, 841–842 (2010).
19. Y. Wu, P. R. Bhat, T. J. Close, S. Lonardi, Efficient and Accurate Construction of Genetic Linkage Maps from the Minimum Spanning Tree of a Graph. *PLoS Genet.* **4**, e1000212 (2008).
20. K. W. Broman, H. Wu, S. Sen, G. A. Churchill, R/qtl: QTL mapping in experimental crosses. *Bioinformatics*. **19**, 889–890 (2003).
21. F. Cabanettes, C. Klopp, D-GENIES: dot plot large genomes in an interactive, efficient and simple way. *PeerJ*. **6**, e4958 (2018).
22. X. Zheng, D. Levine, J. Shen, S. M. Gogarten, C. Laurie, B. S. Weir, A high-performance computing toolset for relatedness and principal component analysis of SNP data. *Bioinformatics*. **28**, 3326–3328 (2012).
23. E. Frichot, F. Mathieu, T. Trouillon, G. Bouchard, O. François, Fast and Efficient Estimation of Individual Ancestry Coefficients. *Genetics*. **196**, 973–983 (2014).

24. S. R. Browning, B. L. Browning, Rapid and Accurate Haplotype Phasing and Missing-Data Inference for Whole-Genome Association Studies By Use of Localized Haplotype Clustering. *Am. J. Hum. Genet.* **81**, 1084–1097 (2007).
25. G. A. Watterson, On the number of segregating sites in genetical models without recombination. *Theor. Popul. Biol.* **7**, 256–276 (1975).
26. M. Nei, F. Tajima, DNA polymorphism detectable by restriction endonucleases. *Genetics.* **97**, 145–167 (1981).
27. F. Tajima, Statistical method for testing the neutral mutation hypothesis by DNA polymorphism. *Genetics.* **123**, 585–595 (1989).
28. N. Scarcelli, P. Cubry, R. Akakpo, A. C. Thuillet, J. Obidiegwu, M. N. Baco, E. Otoo, B. Sonké, A. Dansi, G. Djedatin, C. Mariac, M. Couderc, S. Causse, K. Alix, H. Chaïr, O. François, Y. Vigouroux, Yam genomics supports West Africa as a major cradle of crop domestication. *Sci. Adv.* **5**, eaaw1947 (2019).
29. N. Saitou, M. Nei, The neighbor-joining method: a new method for reconstructing phylogenetic trees. *Mol. Biol. Evol.* **4**, 406–425 (1987).
30. S. Kumar, G. Stecher, M. Li, C. Knyaz, K. Tamura, MEGA X: Molecular Evolutionary Genetics Analysis across Computing Platforms. *Mol. Biol. Evol.* **35**, 1547–1549 (2018).
31. G. Yu, D. K. Smith, H. Zhu, Y. Guan, T. T. Lam, GGTREE: an R package for visualization and annotation of phylogenetic trees with their covariates and other associated data. *Methods Ecol. Evol.* **8**, 28–36 (2017).
32. R. N. Gutenkunst, R. D. Hernandez, S. H. Williamson, C. D. Bustamante, Inferring the Joint Demographic History of Multiple Populations from Multidimensional SNP Frequency Data. *PLoS Genet.* **5**, e1000695 (2009).
33. L. Excoffier, I. Dupanloup, E. Huerta-Sánchez, V. C. Sousa, M. Foll, Robust demographic Inference from genomic and SNP data. *PLoS Genet.* **9**, e1003905 (2013).
34. S. Wright, The genetical structure of populations. *Ann. Eugen.* **15**, 323–354 (1951).
35. H. J. Bandelt, P. Forster, A. Röhl, Median-joining networks for inferring intraspecific phylogenies. *Mol. Biol. Evol.* **16**, 37–48 (1999).
36. J. W. Leigh, D. Bryant, popart: full-feature software for haplotype network construction. *Methods Ecol. Evol.* **6**, 1110–1116 (2015).
37. D. Reich, K. Thangaraj, N. Patterson, A. L. Price, L. Singh, Reconstructing Indian population history. *Nature.* **461**, 489–494 (2009).
38. B. M. Peter, Admixture, Population Structure, and F-Statistics. *Genetics.* **202**, 1485–1501 (2016).
39. D. H. Huson, D. Bryant, Application of Phylogenetic Networks in Evolutionary Studies. *Mol. Biol. Evol.* **23**, 254–267 (2006).
40. N. Scarcelli, H. Chaïr, S. Causse, R. Vesta, T. L. Couvreur, Y. Vigouroux, Crop wild relative conservation: Wild yams are not that wild. *Biol. Conserv.* **210**, 325–333 (2017).

Table SM7. Summary of sequence alignment of mapping population

| Sample    |           | Fastq size     |                | Aligned bam information |                |              |       | Sequence platform                | Comment                | Accession No.                             |
|-----------|-----------|----------------|----------------|-------------------------|----------------|--------------|-------|----------------------------------|------------------------|-------------------------------------------|
| Name      | IITA name | Original (Gbp) | Filtered (Gbp) | Aligned (Gbp)           | Unmapped (Gbp) | Coverage (%) | Depth |                                  |                        |                                           |
| TDr04_219 | TDr04_219 | 38.26          | 33.10          | 17.15                   | 0.32           | 82.8         | 35.73 | MiSeq, HiSeq4000, GAllx          | MP2 family Mono parent | DRR208404,DRR208405,DRR063085             |
| TDr97_777 | TDr97_777 | 25.47          | 22.71          | 11.20                   | 0.29           | 79.4         | 24.35 | MiSeq,HiSeq4000,NextSeq500,GAllx | MP2 family Male parent | DRR063127,DRR208406,DRR045130-7,DRR063111 |
| MP2_001   | MP2_001   | 8.20           | 7.14           | 4.20                    | 1.00           | 76.9         | 9.43  | HiSeq4000                        | -                      | DRR208407                                 |
| MP2_002   | MP2_002   | 6.42           | 5.61           | 3.45                    | 0.64           | 73.2         | 8.13  | HiSeq4000                        | -                      | DRR208408                                 |
| MP2_003   | MP2_003   | 5.95           | 5.11           | 2.92                    | 0.87           | 71.6         | 7.03  | HiSeq4000                        | -                      | DRR208409                                 |
| MP2_004   | MP2_004   | 7.13           | 6.24           | 3.90                    | 0.70           | 74.8         | 8.99  | HiSeq4000                        | -                      | DRR208410                                 |
| MP2_005   | MP2_005   | 9.75           | 8.49           | 4.59                    | 1.56           | 75.2         | 10.53 | HiSeq4000                        | -                      | DRR208411                                 |
| MP2_006   | MP2_006   | 7.90           | 7.01           | 4.39                    | 0.76           | 77.2         | 9.80  | HiSeq4000                        | -                      | DRR208412                                 |
| MP2_007   | MP2_007   | 7.50           | 6.57           | 4.11                    | 0.75           | 75.8         | 9.35  | HiSeq4000                        | -                      | DRR208413                                 |
| MP2_008   | MP2_008   | 7.52           | 6.60           | 3.93                    | 0.81           | 74.3         | 9.13  | HiSeq4000                        | -                      | DRR208414                                 |
| MP2_009   | MP2_009   | 7.36           | 6.48           | 4.12                    | 0.62           | 76.3         | 9.33  | HiSeq4000                        | -                      | DRR208415                                 |
| MP2_010   | MP2_010   | 6.49           | 5.72           | 3.66                    | 0.55           | 75.2         | 8.39  | HiSeq4000                        | -                      | DRR208416                                 |
| MP2_011   | MP2_011   | 5.98           | 5.28           | 3.41                    | 0.49           | 77.1         | 7.63  | HiSeq4000                        | -                      | DRR208417                                 |
| MP2_012   | MP2_012   | 8.25           | 7.31           | 4.69                    | 0.77           | 76.9         | 10.53 | HiSeq4000                        | -                      | DRR208418                                 |
| MP2_013   | MP2_013   | 9.33           | 8.05           | 4.81                    | 1.00           | 76.2         | 10.89 | HiSeq4000                        | -                      | DRR208419                                 |
| MP2_014   | MP2_014   | 9.84           | 8.65           | 5.56                    | 0.81           | 78.0         | 12.32 | HiSeq4000                        | -                      | DRR208420                                 |
| MP2_015   | MP2_015   | 11.21          | 9.80           | 6.29                    | 0.93           | 78.5         | 13.82 | HiSeq4000                        | -                      | DRR208421                                 |
| MP2_016   | MP2_016   | 12.97          | 11.36          | 6.86                    | 1.18           | 78.1         | 15.15 | HiSeq4000                        | -                      | DRR208422                                 |
| MP2_017   | MP2_017   | 3.89           | 2.96           | 1.48                    | 0.36           | 67.0         | 3.83  | HiSeq4000                        | -                      | DRR208423                                 |
| MP2_018   | MP2_018   | 12.70          | 11.17          | 7.04                    | 1.10           | 78.3         | 15.53 | HiSeq4000                        | -                      | DRR208424                                 |
| MP2_019   | MP2_019   | 5.00           | 4.31           | 2.32                    | 0.41           | 74.2         | 5.38  | HiSeq4000                        | -                      | DRR208425                                 |
| MP2_020   | MP2_020   | 10.13          | 9.04           | 6.04                    | 0.78           | 78.1         | 13.34 | HiSeq4000                        | -                      | DRR208426                                 |
| MP2_023   | MP2_023   | 4.98           | 3.90           | 2.10                    | 0.35           | 71.4         | 5.08  | HiSeq4000                        | -                      | DRR208427                                 |
| MP2_024   | MP2_024   | 10.08          | 8.74           | 5.10                    | 1.27           | 75.4         | 11.68 | HiSeq4000                        | -                      | DRR208428                                 |
| MP2_025   | MP2_025   | 4.80           | 3.53           | 1.91                    | 0.38           | 70.2         | 4.70  | HiSeq4000                        | -                      | DRR208429                                 |
| MP2_026   | MP2_026   | 8.36           | 7.38           | 4.88                    | 0.66           | 77.5         | 10.86 | HiSeq4000                        | -                      | DRR208430                                 |
| MP2_027   | MP2_027   | 5.35           | 3.86           | 2.05                    | 0.37           | 71.6         | 4.93  | HiSeq4000                        | -                      | DRR208431                                 |
| MP2_028   | MP2_028   | 8.11           | 7.08           | 4.45                    | 0.72           | 76.4         | 10.05 | HiSeq4000                        | -                      | DRR208432                                 |
| MP2_029   | MP2_029   | 9.89           | 8.61           | 5.03                    | 1.08           | 75.4         | 11.52 | HiSeq4000                        | -                      | DRR208433                                 |
| MP2_031   | MP2_031   | 10.33          | 9.08           | 6.04                    | 0.79           | 78.5         | 13.30 | HiSeq4000                        | -                      | DRR208434                                 |
| MP2_032   | MP2_032   | 16.56          | 12.57          | 6.45                    | 1.21           | 78.9         | 14.12 | HiSeq4000                        | -                      | DRR208435                                 |
| MP2_033   | MP2_033   | 7.32           | 6.41           | 4.19                    | 0.62           | 77.5         | 9.34  | HiSeq4000                        | -                      | DRR208436                                 |
| MP2_034   | MP2_034   | 8.05           | 6.99           | 4.40                    | 0.79           | 75.0         | 10.12 | HiSeq4000                        | -                      | DRR208437                                 |
| MP2_035   | MP2_035   | 9.06           | 7.95           | 4.96                    | 0.83           | 77.3         | 11.07 | HiSeq4000                        | -                      | DRR208438                                 |
| MP2_037   | MP2_037   | 9.70           | 8.41           | 5.16                    | 0.99           | 77.3         | 11.53 | HiSeq4000                        | -                      | DRR208439                                 |
| MP2_039   | MP2_039   | 7.54           | 6.58           | 4.00                    | 0.82           | 75.4         | 9.17  | HiSeq4000                        | -                      | DRR208440                                 |
| MP2_043   | MP2_043   | 9.15           | 7.93           | 4.24                    | 0.71           | 77.3         | 9.46  | HiSeq4000                        | -                      | DRR208441                                 |
| MP2_044   | MP2_044   | 9.75           | 8.60           | 5.28                    | 0.95           | 76.9         | 11.85 | HiSeq4000                        | -                      | DRR208442                                 |
| MP2_047   | MP2_047   | 8.95           | 7.64           | 4.04                    | 0.76           | 77.1         | 9.03  | HiSeq4000                        | -                      | DRR208443                                 |
| MP2_048   | MP2_048   | 8.27           | 7.24           | 3.94                    | 0.69           | 77.4         | 8.80  | HiSeq4000                        | -                      | DRR208444                                 |
| MP2_050   | MP2_050   | 11.17          | 9.77           | 5.67                    | 1.35           | 76.2         | 12.85 | HiSeq4000                        | -                      | DRR208445                                 |
| MP2_052   | MP2_052   | 9.98           | 8.75           | 5.18                    | 1.13           | 75.1         | 11.90 | HiSeq4000                        | -                      | DRR208446                                 |
| MP2_053   | MP2_053   | 11.85          | 9.88           | 4.74                    | 2.21           | 72.0         | 11.37 | HiSeq4000                        | -                      | DRR208447                                 |
| MP2_054   | MP2_054   | 10.38          | 6.95           | 3.67                    | 0.70           | 77.1         | 8.21  | HiSeq4000                        | -                      | DRR208448                                 |
| MP2_055   | MP2_055   | 12.74          | 10.66          | 5.55                    | 1.85           | 74.8         | 12.81 | HiSeq4000                        | -                      | DRR208449                                 |

|         |         |       |       |      |      |      |       |           |   |           |
|---------|---------|-------|-------|------|------|------|-------|-----------|---|-----------|
| MP2_057 | MP2_057 | 8.68  | 7.41  | 4.06 | 1.24 | 72.2 | 9.72  | HiSeq4000 | - | DRR208450 |
| MP2_058 | MP2_058 | 11.14 | 9.54  | 6.10 | 0.89 | 78.2 | 13.47 | HiSeq4000 | - | DRR208451 |
| MP2_060 | MP2_060 | 8.31  | 7.05  | 3.51 | 0.79 | 76.0 | 7.97  | HiSeq4000 | - | DRR208452 |
| MP2_061 | MP2_061 | 12.07 | 10.38 | 6.88 | 0.95 | 79.0 | 15.04 | HiSeq4000 | - | DRR208453 |
| MP2_063 | MP2_063 | 7.03  | 5.43  | 2.96 | 0.51 | 76.3 | 6.71  | HiSeq4000 | - | DRR208454 |
| MP2_064 | MP2_064 | 11.23 | 9.50  | 5.46 | 1.28 | 76.0 | 12.39 | HiSeq4000 | - | DRR208455 |
| MP2_113 | MP2_113 | 6.79  | 5.71  | 3.29 | 0.79 | 75.0 | 7.57  | HiSeq4000 | - | DRR208456 |
| MP2_114 | MP2_114 | 7.80  | 6.62  | 3.60 | 0.94 | 70.9 | 8.75  | HiSeq4000 | - | DRR208457 |
| MP2_116 | MP2_116 | 7.17  | 6.14  | 3.78 | 0.66 | 75.5 | 8.64  | HiSeq4000 | - | DRR208458 |
| MP2_117 | MP2_117 | 6.52  | 5.53  | 3.38 | 0.55 | 75.9 | 7.69  | HiSeq4000 | - | DRR208459 |
| MP2_121 | MP2_121 | 11.64 | 10.04 | 5.72 | 1.45 | 76.1 | 12.96 | HiSeq4000 | - | DRR208460 |
| MP2_122 | MP2_122 | 9.07  | 7.65  | 4.33 | 1.15 | 75.5 | 9.89  | HiSeq4000 | - | DRR208461 |
| MP2_125 | MP2_125 | 9.25  | 8.04  | 4.87 | 0.86 | 77.7 | 10.82 | HiSeq4000 | - | DRR208462 |
| MP2_126 | MP2_126 | 8.65  | 7.46  | 4.36 | 1.00 | 76.1 | 9.89  | HiSeq4000 | - | DRR208463 |
| MP2_127 | MP2_127 | 11.45 | 9.94  | 6.22 | 0.99 | 78.0 | 13.76 | HiSeq4000 | - | DRR208464 |
| MP2_128 | MP2_128 | 10.17 | 8.91  | 5.41 | 1.01 | 77.1 | 12.11 | HiSeq4000 | - | DRR208465 |
| MP2_129 | MP2_129 | 11.75 | 10.05 | 5.97 | 1.32 | 77.4 | 13.30 | HiSeq4000 | - | DRR208466 |
| MP2_130 | MP2_130 | 9.04  | 7.78  | 4.94 | 0.75 | 76.8 | 11.10 | HiSeq4000 | - | DRR208467 |
| MP2_131 | MP2_131 | 10.02 | 8.69  | 5.59 | 0.85 | 78.2 | 12.34 | HiSeq4000 | - | DRR208468 |
| MP2_132 | MP2_132 | 9.93  | 8.56  | 5.23 | 0.99 | 77.2 | 11.69 | HiSeq4000 | - | DRR208469 |
| MP2_133 | MP2_133 | 7.97  | 6.87  | 4.29 | 0.71 | 77.0 | 9.63  | HiSeq4000 | - | DRR208470 |
| MP2_136 | MP2_136 | 9.56  | 8.20  | 4.48 | 1.48 | 76.2 | 10.14 | HiSeq4000 | - | DRR208471 |
| MP2_137 | MP2_137 | 10.99 | 9.51  | 5.70 | 1.15 | 76.5 | 12.86 | HiSeq4000 | - | DRR208472 |
| MP2_138 | MP2_138 | 8.51  | 7.42  | 4.61 | 0.76 | 77.3 | 10.28 | HiSeq4000 | - | DRR208473 |
| MP2_139 | MP2_139 | 9.41  | 8.27  | 5.12 | 0.83 | 75.9 | 11.65 | HiSeq4000 | - | DRR208474 |
| MP2_140 | MP2_140 | 8.91  | 7.74  | 4.74 | 0.90 | 76.9 | 10.65 | HiSeq4000 | - | DRR208475 |
| MP2_141 | MP2_141 | 9.22  | 7.61  | 4.05 | 1.22 | 72.2 | 9.69  | HiSeq4000 | - | DRR208476 |
| MP2_142 | MP2_142 | 10.72 | 9.12  | 4.11 | 2.49 | 73.3 | 9.67  | HiSeq4000 | - | DRR208477 |
| MP2_143 | MP2_143 | 7.99  | 6.94  | 4.03 | 0.91 | 75.3 | 9.24  | HiSeq4000 | - | DRR208478 |
| MP2_144 | MP2_144 | 9.30  | 8.14  | 5.31 | 0.79 | 77.5 | 11.83 | HiSeq4000 | - | DRR208479 |
| MP2_145 | MP2_145 | 10.35 | 8.99  | 5.13 | 1.17 | 76.5 | 11.56 | HiSeq4000 | - | DRR208480 |
| MP2_146 | MP2_146 | 10.87 | 9.44  | 5.39 | 1.41 | 77.1 | 12.07 | HiSeq4000 | - | DRR208481 |
| MP2_147 | MP2_147 | 9.96  | 8.80  | 5.79 | 0.76 | 78.4 | 12.75 | HiSeq4000 | - | DRR208482 |
| MP2_149 | MP2_149 | 9.80  | 8.64  | 5.74 | 0.78 | 78.0 | 12.71 | HiSeq4000 | - | DRR208483 |
| MP2_150 | MP2_150 | 7.47  | 6.31  | 3.17 | 1.22 | 71.5 | 7.65  | HiSeq4000 | - | DRR208484 |
| MP2_151 | MP2_151 | 8.96  | 7.85  | 4.80 | 0.90 | 78.0 | 10.63 | HiSeq4000 | - | DRR208485 |
| MP2_152 | MP2_152 | 12.30 | 10.66 | 6.41 | 1.29 | 78.8 | 14.02 | HiSeq4000 | - | DRR208486 |
| MP2_154 | MP2_154 | 9.78  | 8.41  | 4.56 | 1.42 | 75.8 | 10.38 | HiSeq4000 | - | DRR208487 |
| MP2_155 | MP2_155 | 10.40 | 9.01  | 5.31 | 1.23 | 77.5 | 11.82 | HiSeq4000 | - | DRR208488 |
| MP2_156 | MP2_156 | 8.67  | 7.49  | 4.32 | 1.00 | 76.2 | 9.79  | HiSeq4000 | - | DRR208489 |
| MP2_157 | MP2_157 | 7.64  | 6.64  | 4.00 | 0.84 | 76.0 | 9.08  | HiSeq4000 | - | DRR208490 |
| MP2_158 | MP2_158 | 8.84  | 7.67  | 4.85 | 0.79 | 77.8 | 10.77 | HiSeq4000 | - | DRR208491 |
| MP2_159 | MP2_159 | 9.82  | 8.47  | 4.97 | 1.16 | 77.2 | 11.10 | HiSeq4000 | - | DRR208492 |
| MP2_160 | MP2_160 | 8.43  | 7.33  | 4.57 | 0.73 | 77.2 | 10.23 | HiSeq4000 | - | DRR208493 |
| MP2_161 | MP2_161 | 8.93  | 7.71  | 4.46 | 1.10 | 77.1 | 9.99  | HiSeq4000 | - | DRR208494 |
| MP2_162 | MP2_162 | 12.11 | 10.46 | 5.71 | 1.62 | 77.4 | 12.73 | HiSeq4000 | - | DRR208495 |
| MP2_166 | MP2_166 | 12.03 | 10.49 | 6.27 | 1.21 | 76.7 | 14.09 | HiSeq4000 | - | DRR208496 |
| MP2_167 | MP2_167 | 9.67  | 8.39  | 4.63 | 1.31 | 74.7 | 10.70 | HiSeq4000 | - | DRR208497 |
| MP2_168 | MP2_168 | 15.43 | 13.47 | 8.68 | 1.28 | 79.0 | 18.96 | HiSeq4000 | - | DRR208498 |



|         |         |       |       |      |      |      |       |           |   |           |
|---------|---------|-------|-------|------|------|------|-------|-----------|---|-----------|
| MP2_169 | MP2_169 | 12.87 | 11.15 | 6.58 | 1.40 | 77.7 | 14.62 | HiSeq4000 | - | DRR208499 |
| MP2_170 | MP2_170 | 13.20 | 11.31 | 6.24 | 1.83 | 77.3 | 13.94 | HiSeq4000 | - | DRR208500 |
| MP2_172 | MP2_172 | 11.50 | 9.60  | 5.68 | 1.08 | 75.6 | 12.97 | HiSeq4000 | - | DRR208501 |
| MP2_173 | MP2_173 | 10.20 | 8.86  | 4.90 | 1.31 | 74.9 | 11.28 | HiSeq4000 | - | DRR208502 |
| MP2_174 | MP2_174 | 10.70 | 9.28  | 5.37 | 1.26 | 77.7 | 11.95 | HiSeq4000 | - | DRR208503 |
| MP2_175 | MP2_175 | 13.09 | 11.51 | 7.00 | 1.21 | 77.4 | 15.60 | HiSeq4000 | - | DRR208504 |
| MP2_177 | MP2_177 | 6.33  | 5.38  | 2.88 | 1.00 | 71.7 | 6.93  | HiSeq4000 | - | DRR208505 |
| MP2_178 | MP2_178 | 5.89  | 5.10  | 3.00 | 0.66 | 73.2 | 7.07  | HiSeq4000 | - | DRR208506 |
| MP2_179 | MP2_179 | 4.55  | 3.89  | 2.47 | 0.42 | 73.5 | 5.79  | HiSeq4000 | - | DRR208507 |
| MP2_180 | MP2_180 | 7.09  | 6.10  | 3.54 | 0.86 | 74.8 | 8.17  | HiSeq4000 | - | DRR208508 |
| MP2_181 | MP2_181 | 6.41  | 5.45  | 3.05 | 0.91 | 72.6 | 7.26  | HiSeq4000 | - | DRR208509 |
| MP2_182 | MP2_182 | 8.34  | 7.16  | 4.72 | 0.71 | 78.2 | 10.42 | HiSeq4000 | - | DRR208510 |
| MP2_183 | MP2_183 | 8.89  | 7.74  | 5.12 | 0.74 | 77.0 | 11.47 | HiSeq4000 | - | DRR208511 |
| MP2_185 | MP2_185 | 6.46  | 5.49  | 3.06 | 0.97 | 72.4 | 7.30  | HiSeq4000 | - | DRR208512 |
| MP2_186 | MP2_186 | 6.37  | 5.37  | 3.39 | 0.59 | 76.0 | 7.70  | HiSeq4000 | - | DRR208513 |
| MP2_187 | MP2_187 | 5.86  | 4.97  | 2.86 | 0.72 | 72.4 | 6.83  | HiSeq4000 | - | DRR208514 |
| MP2_188 | MP2_188 | 8.36  | 7.11  | 4.48 | 0.83 | 76.4 | 10.12 | HiSeq4000 | - | DRR208515 |
| MP2_189 | MP2_189 | 6.63  | 5.69  | 3.34 | 0.75 | 73.9 | 7.80  | HiSeq4000 | - | DRR208516 |
| MP2_190 | MP2_190 | 6.41  | 5.35  | 3.44 | 0.58 | 77.4 | 7.67  | HiSeq4000 | - | DRR208517 |
| MP2_191 | MP2_191 | 7.46  | 6.22  | 3.76 | 0.85 | 74.9 | 8.67  | HiSeq4000 | - | DRR208518 |
| MP2_192 | MP2_192 | 6.76  | 5.71  | 3.54 | 0.64 | 74.8 | 8.16  | HiSeq4000 | - | DRR208519 |
| MP2_193 | MP2_193 | 9.63  | 8.56  | 5.41 | 0.86 | 77.5 | 12.06 | HiSeq4000 | - | DRR208520 |
| MP2_196 | MP2_196 | 11.11 | 9.85  | 6.23 | 0.96 | 78.2 | 13.76 | HiSeq4000 | - | DRR208521 |
| MP2_197 | MP2_197 | 7.35  | 6.22  | 3.96 | 0.66 | 76.6 | 8.92  | HiSeq4000 | - | DRR208522 |
| MP2_198 | MP2_198 | 8.72  | 7.48  | 4.86 | 0.74 | 78.2 | 10.74 | HiSeq4000 | - | DRR208523 |
| MP2_199 | MP2_199 | 6.66  | 5.90  | 3.58 | 0.69 | 74.8 | 8.25  | HiSeq4000 | - | DRR208524 |
| MP2_200 | MP2_200 | 7.00  | 6.22  | 3.99 | 0.61 | 75.8 | 9.08  | HiSeq4000 | - | DRR208525 |
| MP2_201 | MP2_201 | 8.36  | 7.17  | 4.39 | 0.86 | 75.4 | 10.06 | HiSeq4000 | - | DRR208526 |
| MP2_202 | MP2_202 | 9.03  | 7.71  | 3.83 | 1.87 | 74.4 | 8.88  | HiSeq4000 | - | DRR208527 |
| MP2_203 | MP2_203 | 7.58  | 6.73  | 4.06 | 0.76 | 76.8 | 9.12  | HiSeq4000 | - | DRR208528 |
| MP2_204 | MP2_204 | 10.55 | 9.21  | 5.02 | 1.48 | 77.2 | 11.22 | HiSeq4000 | - | DRR208529 |
| MP2_205 | MP2_205 | 11.71 | 10.10 | 6.18 | 1.22 | 77.5 | 13.76 | HiSeq4000 | - | DRR208530 |
| MP2_206 | MP2_206 | 8.72  | 7.29  | 3.94 | 1.43 | 74.1 | 9.16  | HiSeq4000 | - | DRR208531 |
| MP2_208 | MP2_208 | 11.54 | 10.28 | 6.41 | 1.12 | 78.2 | 14.16 | HiSeq4000 | - | DRR208532 |
| MP2_211 | MP2_211 | 9.81  | 8.70  | 5.44 | 1.02 | 78.4 | 11.98 | HiSeq4000 | - | DRR208533 |
| MP2_213 | MP2_213 | 10.05 | 8.77  | 5.30 | 1.02 | 78.0 | 11.73 | HiSeq4000 | - | DRR208534 |
| MP2_214 | MP2_214 | 8.64  | 7.69  | 4.64 | 0.96 | 76.1 | 10.53 | HiSeq4000 | - | DRR208535 |
| MP2_215 | MP2_215 | 9.92  | 8.76  | 5.62 | 0.81 | 78.0 | 12.43 | HiSeq4000 | - | DRR208536 |
| MP2_216 | MP2_216 | 9.92  | 8.64  | 5.19 | 1.10 | 75.4 | 11.88 | HiSeq4000 | - | DRR208537 |
| MP2_218 | MP2_218 | 9.62  | 8.52  | 5.24 | 1.10 | 75.4 | 11.99 | HiSeq4000 | - | DRR208538 |
| MP2_219 | MP2_219 | 7.57  | 6.57  | 4.15 | 0.70 | 74.8 | 9.57  | HiSeq4000 | - | DRR208539 |
| MP2_220 | MP2_220 | 7.81  | 6.90  | 4.21 | 0.78 | 76.1 | 9.55  | HiSeq4000 | - | DRR208540 |
| MP2_221 | MP2_221 | 9.33  | 8.28  | 5.13 | 0.92 | 76.2 | 11.63 | HiSeq4000 | - | DRR208541 |
| MP2_222 | MP2_222 | 9.13  | 7.90  | 4.79 | 1.02 | 75.7 | 10.93 | HiSeq4000 | - | DRR208542 |
| MP2_224 | MP2_224 | 11.19 | 9.85  | 6.23 | 1.05 | 77.1 | 13.95 | HiSeq4000 | - | DRR208543 |
| MP2_225 | MP2_225 | 8.97  | 7.74  | 4.41 | 1.09 | 74.2 | 10.25 | HiSeq4000 | - | DRR208544 |
| MP2_227 | MP2_227 | 14.19 | 12.43 | 7.97 | 1.15 | 78.7 | 17.48 | HiSeq4000 | - | DRR208545 |
| MP2_228 | MP2_228 | 9.03  | 7.86  | 4.92 | 0.90 | 76.8 | 11.05 | HiSeq4000 | - | DRR208546 |
| MP2_229 | MP2_229 | 10.39 | 9.13  | 5.71 | 0.97 | 77.5 | 12.73 | HiSeq4000 | - | DRR208547 |

|         |         |       |      |      |      |      |       |           |   |           |
|---------|---------|-------|------|------|------|------|-------|-----------|---|-----------|
| MP2_231 | MP2_231 | 10.31 | 8.99 | 5.62 | 0.96 | 77.6 | 12.50 | HiSeq4000 | - | DRR208548 |
| MP2_232 | MP2_232 | 11.06 | 9.64 | 6.00 | 1.04 | 77.1 | 13.41 | HiSeq4000 | - | DRR208549 |
| MP2_233 | MP2_233 | 9.57  | 8.46 | 5.23 | 1.07 | 76.8 | 11.76 | HiSeq4000 | - | DRR208550 |
| MP2_234 | MP2_234 | 6.96  | 6.02 | 3.42 | 0.89 | 73.4 | 8.05  | HiSeq4000 | - | DRR208551 |
| MP2_235 | MP2_235 | 8.71  | 7.54 | 4.21 | 1.25 | 73.9 | 9.82  | HiSeq4000 | - | DRR208552 |
| MP2_236 | MP2_236 | 5.82  | 4.95 | 3.06 | 0.56 | 73.8 | 7.16  | HiSeq4000 | - | DRR208553 |
| MP2_237 | MP2_237 | 6.46  | 5.55 | 3.27 | 0.80 | 74.2 | 7.61  | HiSeq4000 | - | DRR208554 |
| MP2_239 | MP2_239 | 7.08  | 6.14 | 3.77 | 0.73 | 75.0 | 8.66  | HiSeq4000 | - | DRR208555 |
| MP2_240 | MP2_240 | 6.92  | 6.00 | 3.70 | 0.78 | 74.4 | 8.59  | HiSeq4000 | - | DRR208556 |
| MP2_241 | MP2_241 | 10.28 | 8.87 | 4.73 | 1.60 | 74.7 | 10.92 | HiSeq4000 | - | DRR208557 |
| MP2_242 | MP2_242 | 8.82  | 7.65 | 4.62 | 0.85 | 75.3 | 10.58 | HiSeq4000 | - | DRR208558 |
| MP2_245 | MP2_245 | 5.90  | 5.15 | 3.32 | 0.51 | 76.3 | 7.50  | HiSeq4000 | - | DRR208559 |
| MP2_246 | MP2_246 | 6.86  | 5.98 | 3.77 | 0.70 | 76.6 | 8.50  | HiSeq4000 | - | DRR208560 |
| MP2_247 | MP2_247 | 6.97  | 6.01 | 3.70 | 0.65 | 74.3 | 8.61  | HiSeq4000 | - | DRR208561 |
| MP2_248 | MP2_248 | 6.45  | 5.60 | 3.62 | 0.57 | 76.7 | 8.14  | HiSeq4000 | - | DRR208562 |

Table SM11. All sequence information of ourgroups.

| Sample      |                               | Fastq size     |                | Aligned bam information |                |              |       | Comment                                            | Accession No. |
|-------------|-------------------------------|----------------|----------------|-------------------------|----------------|--------------|-------|----------------------------------------------------|---------------|
| Name        | Name in Scarcelli et al. 2019 | Original (Gbp) | Filtered (Gbp) | Aligned (Gbp)           | Unmapped (Gbp) | Coverage (%) | Depth |                                                    |               |
| alata1      |                               | 28.11          | 23.95          | 10.73                   | 1.24           | 48.0         | 38.59 | D.alata                                            | ERR1019033    |
| alata2      |                               | 11.58          | 11.15          | 3.88                    | 1.37           | 43.1         | 15.54 | D.alata                                            | SRR7062294    |
| ns004_A5689 | A5689                         | 4.22           | 4.19           | 3.09                    | 0.34           | 75.2         | 7.09  | D.abyssinica:Nigeria                               | SRR8451439    |
| ns005_A5690 | A5690                         | 5.79           | 5.72           | 4.06                    | 0.37           | 68.5         | 10.24 | D.abyssinica:Nigeria                               | SRR8451438    |
| ns006_A5691 | A5691                         | 5.53           | 5.49           | 2.85                    | 1.73           | 68.4         | 7.20  | D.abyssinica:Nigeria                               | SRR8451437    |
| ns007_A5693 | A5693                         | 5.93           | 5.89           | 4.54                    | 0.15           | 78.3         | 10.01 | D.abyssinica:Nigeria                               | SRR8451434    |
| ns008_A5694 | A5694                         | 4.87           | 4.84           | 3.91                    | 0.04           | 77.3         | 8.72  | D.abyssinica:Nigeria                               | SRR8451371    |
| ns009_A5695 | A5695                         | 4.55           | 4.52           | 3.35                    | 0.42           | 78.4         | 7.37  | D.abyssinica:Nigeria                               | SRR8451459    |
| ns010_A5696 | A5696                         | 4.75           | 4.61           | 3.55                    | 0.22           | 74.9         | 8.17  | D.abyssinica:Nigeria                               | SRR8451458    |
| ns011_A5697 | A5697                         | 5.70           | 5.66           | 4.41                    | 0.15           | 80.2         | 9.48  | D.abyssinica:Nigeria                               | SRR8451382    |
| ns012_A5699 | A5699                         | 3.25           | 3.22           | 2.45                    | 0.15           | 71.8         | 5.89  | D.abyssinica:Nigeria                               | SRR8451381    |
| ns013_A5700 | A5700                         | 4.79           | 4.76           | 3.59                    | 0.32           | 77.0         | 8.05  | D.abyssinica:Nigeria                               | SRR8451384    |
| ns014_A5701 | A5701                         | 5.99           | 5.95           | 4.38                    | 0.37           | 78.6         | 9.62  | D.abyssinica:Nigeria                               | SRR8451383    |
| ns015_A5702 | A5702                         | 3.96           | 3.93           | 2.95                    | 0.29           | 74.9         | 6.79  | D.abyssinica:Nigeria                               | SRR8451378    |
| ns016_A5703 | A5703                         | 4.53           | 4.49           | 3.09                    | 0.37           | 65.3         | 8.17  | D.abyssinica:Nigeria                               | SRR8451377    |
| ns017_A5704 | A5704                         | 4.95           | 4.91           | 2.85                    | 1.17           | 69.6         | 7.08  | D.abyssinica:Nigeria                               | SRR8451380    |
| ns018_A5705 | A5705                         | 5.54           | 5.49           | 3.75                    | 0.67           | 74.5         | 8.68  | D.abyssinica:Nigeria                               | SRR8451379    |
| ns019_A52   | A52                           | 1.66           | 1.63           | 1.44                    | 0.02           | 70.8         | 3.52  | D.abyssinica:Benin                                 | SRR8451376    |
| ns020_A62   | A62                           | 2.35           | 2.31           | 2.06                    | 0.02           | 77.3         | 4.60  | D.abyssinica:Benin                                 | SRR8451375    |
| ns021_A67   | A67                           | 7.54           | 7.42           | 6.12                    | 0.12           | 85.2         | 12.40 | D.abyssinica:Benin                                 | SRR8451343    |
| ns023_A467  | A467                          | 5.72           | 5.64           | 5.08                    | 0.06           | 82.0         | 10.69 | D.abyssinica:Benin                                 | SRR8451345    |
| ns024_A537  | A537                          | 6.22           | 6.13           | 5.28                    | 0.05           | 79.3         | 11.49 | D.abyssinica:Benin                                 | SRR8451346    |
| ns025_A3009 | A3009                         | 3.33           | 3.27           | 2.92                    | 0.03           | 76.7         | 6.57  | D.abyssinica:Benin                                 | SRR8451347    |
| ns027_A5068 | A5068                         | 1.98           | 1.95           | 1.67                    | 0.04           | 65.7         | 4.38  | D.abyssinica:Ghana                                 | SRR8451349    |
| ns028_A5045 | A5045                         | 2.61           | 2.56           | 2.21                    | 0.04           | 74.4         | 5.12  | D.abyssinica:Ghana                                 | SRR8451350    |
| ns029_A5047 | A5047                         | 3.32           | 3.27           | 2.80                    | 0.04           | 75.0         | 6.46  | D.abyssinica:Ghana                                 | SRR8451351    |
| ns030_A5048 | A5048                         | 9.39           | 9.23           | 7.75                    | 0.10           | 82.9         | 16.14 | D.abyssinica:Ghana                                 | SRR8451352    |
| ns031_A5059 | A5059                         | 10.28          | 10.10          | 7.09                    | 1.66           | 82.5         | 14.82 | D.abyssinica:Ghana                                 | SRR8451320    |
| ns032_A5061 | A5061                         | 2.81           | 2.77           | 1.91                    | 0.54           | 72.4         | 4.55  | D.abyssinica:Ghana                                 | SRR8451319    |
| ns033_A5066 | A5066                         | 8.09           | 7.95           | 6.74                    | 0.11           | 80.7         | 14.41 | D.abyssinica:Ghana                                 | SRR8451318    |
| ns034_A5067 | A5067                         | 7.67           | 7.55           | 6.51                    | 0.06           | 82.0         | 13.71 | D.abyssinica:Ghana                                 | SRR8451317    |
| ns035_P5344 | P5344                         | 3.33           | 3.30           | 2.46                    | 0.10           | 70.6         | 6.02  | D.praehensilis:Cameroon:Cameroonian D.praehensilis | SRR8451316    |
| ns036_P5350 | P5350                         | 4.06           | 4.02           | 2.77                    | 0.20           | 63.5         | 7.52  | D.praehensilis:Cameroon:Cameroonian D.praehensilis | SRR8451315    |
| ns037_P5358 | P5358                         | 4.21           | 4.17           | 3.09                    | 0.15           | 73.2         | 7.29  | D.praehensilis:Cameroon:Cameroonian D.praehensilis | SRR8451314    |
| ns038_P5369 | P5369                         | 3.10           | 3.08           | 2.17                    | 0.32           | 70.2         | 5.34  | D.praehensilis:Cameroon:Cameroonian D.praehensilis | SRR8451313    |
| ns039_P5378 | P5378                         | 3.01           | 2.99           | 2.31                    | 0.05           | 70.5         | 5.66  | D.praehensilis:Cameroon:Cameroonian D.praehensilis | SRR8451322    |
| ns040_P5381 | P5381                         | 3.90           | 3.87           | 2.97                    | 0.11           | 72.8         | 7.05  | D.praehensilis:Cameroon:Cameroonian D.praehensilis | SRR8451321    |

|             |       |      |      |      |      |      |       |                                                    |            |
|-------------|-------|------|------|------|------|------|-------|----------------------------------------------------|------------|
| ns041_P5404 | P5404 | 4.53 | 4.49 | 3.31 | 0.31 | 74.3 | 7.69  | D.praehensilis:Cameroon:Cameroonian D.praehensilis | SRR8451462 |
| ns042_P5413 | P5413 | 3.78 | 3.75 | 2.82 | 0.16 | 73.5 | 6.62  | D.praehensilis:Cameroon:Cameroonian D.praehensilis | SRR8451463 |
| ns043_P5417 | P5417 | 4.61 | 4.58 | 3.44 | 0.19 | 74.1 | 8.01  | D.praehensilis:Cameroon:Cameroonian D.praehensilis | SRR8451460 |
| ns044_P5420 | P5420 | 2.25 | 2.23 | 1.65 | 0.15 | 65.9 | 4.31  | D.praehensilis:Cameroon:Cameroonian D.praehensilis | SRR8451461 |
| ns045_P5424 | P5424 | 5.30 | 5.26 | 3.74 | 0.42 | 74.4 | 8.68  | D.praehensilis:Cameroon:Cameroonian D.praehensilis | SRR8451466 |
| ns046_P5427 | P5427 | 4.25 | 4.22 | 3.24 | 0.05 | 72.9 | 7.66  | D.praehensilis:Cameroon:Cameroonian D.praehensilis | SRR8451467 |
| ns047_P5430 | P5430 | 3.34 | 3.31 | 2.41 | 0.10 | 63.5 | 6.56  | D.praehensilis:Cameroon:Cameroonian D.praehensilis | SRR8451464 |
| ns048_P5434 | P5434 | 2.80 | 2.77 | 2.10 | 0.06 | 61.8 | 5.86  | D.praehensilis:Cameroon:Cameroonian D.praehensilis | SRR8451465 |
| ns049_P5438 | P5438 | 3.64 | 3.61 | 2.36 | 0.62 | 70.6 | 5.76  | D.praehensilis:Cameroon:Cameroonian D.praehensilis | SRR8451468 |
| ns050_P5441 | P5441 | 4.13 | 4.09 | 3.04 | 0.23 | 73.7 | 7.12  | D.praehensilis:Cameroon:Cameroonian D.praehensilis | SRR8451469 |
| ns051_P5448 | P5448 | 4.73 | 4.69 | 3.66 | 0.09 | 73.6 | 8.58  | D.praehensilis:Cameroon:Cameroonian D.praehensilis | SRR8451449 |
| ns054_P5318 | P5318 | 5.04 | 4.99 | 3.07 | 0.62 | 67.7 | 7.83  | D.praehensilis:Cameroon:Cameroonian D.praehensilis | SRR8451450 |
| ns055_P5746 | P5746 | 3.80 | 3.77 | 2.66 | 0.43 | 65.3 | 7.02  | D.praehensilis:Nigeria:Western D.praehensilis      | SRR8451453 |
| ns056_P5708 | P5708 | 6.19 | 6.13 | 4.22 | 0.39 | 64.5 | 11.30 | D.praehensilis:Nigeria:Western D.praehensilis      | SRR8451452 |
| ns057_P5710 | P5710 | 3.89 | 3.86 | 2.61 | 0.48 | 70.0 | 6.42  | D.praehensilis:Nigeria:Western D.praehensilis      | SRR8451455 |
| ns058_P5713 | P5713 | 3.24 | 3.21 | 2.34 | 0.22 | 67.2 | 6.02  | D.praehensilis:Nigeria:Western D.praehensilis      | SRR8451454 |
| ns059_P5716 | P5716 | 2.56 | 2.53 | 1.91 | 0.03 | 63.0 | 5.23  | D.praehensilis:Nigeria:Western D.praehensilis      | SRR8451457 |
| ns061_P5720 | P5720 | 3.87 | 3.84 | 2.99 | 0.17 | 73.5 | 7.02  | D.praehensilis:Nigeria:Western D.praehensilis      | SRR8451430 |
| ns062_P5723 | P5723 | 3.63 | 3.61 | 2.17 | 0.93 | 68.9 | 5.44  | D.praehensilis:Nigeria:Western D.praehensilis      | SRR8451431 |
| ns063_P5728 | P5728 | 3.75 | 3.71 | 2.65 | 0.34 | 64.3 | 7.11  | D.praehensilis:Nigeria:Western D.praehensilis      | SRR8451432 |
| ns064_P5729 | P5729 | 7.31 | 7.25 | 4.58 | 1.01 | 72.5 | 10.89 | D.praehensilis:Nigeria:Western D.praehensilis      | SRR8451433 |
| ns065_P424  | P424  | 3.46 | 3.40 | 3.03 | 0.04 | 79.1 | 6.61  | D.praehensilis:Benin:Western D.praehensilis        | SRR8451426 |
| ns066_P425  | P425  | 1.63 | 1.60 | 1.44 | 0.02 | 69.5 | 3.57  | D.praehensilis:Benin:Western D.praehensilis        | SRR8451427 |
| ns067_P457  | P457  | 4.21 | 4.13 | 3.46 | 0.12 | 74.5 | 8.01  | D.praehensilis:Benin:Western D.praehensilis        | SRR8451428 |
| ns068_P462  | P462  | 4.33 | 4.26 | 3.68 | 0.08 | 79.7 | 7.98  | D.praehensilis:Benin:Western D.praehensilis        | SRR8451429 |
| ns069_P323  | P323  | 4.22 | 4.15 | 3.70 | 0.05 | 80.5 | 7.94  | D.praehensilis:Benin:Western D.praehensilis        | SRR8451435 |
| ns070_P464  | P464  | 5.29 | 5.21 | 4.65 | 0.05 | 80.6 | 9.96  | D.praehensilis:Benin:Western D.praehensilis        | SRR8451436 |
| ns073_P2990 | P2990 | 2.88 | 2.84 | 2.56 | 0.03 | 77.6 | 5.70  | D.praehensilis:Benin:Western D.praehensilis        | SRR8451409 |
| ns075_P4918 | P4918 | 2.45 | 2.40 | 1.82 | 0.27 | 72.6 | 4.33  | D.praehensilis:Ghana:Western D.praehensilis        | SRR8451415 |
| ns076_P4919 | P4919 | 5.46 | 5.36 | 4.04 | 0.45 | 79.4 | 8.79  | D.praehensilis:Ghana:Western D.praehensilis        | SRR8451414 |
| ns077_P4920 | P4920 | 6.04 | 5.93 | 4.63 | 0.53 | 80.3 | 9.95  | D.praehensilis:Ghana:Western D.praehensilis        | SRR8451413 |
| ns078_P4921 | P4921 | 4.73 | 4.65 | 3.73 | 0.31 | 79.5 | 8.11  | D.praehensilis:Ghana:Western D.praehensilis        | SRR8451412 |
| ns079_P4928 | P4928 | 3.77 | 3.71 | 2.99 | 0.24 | 78.4 | 6.57  | D.praehensilis:Ghana :Western D.praehensilis       | SRR8451407 |
